# Supplementary material
Source: publisher figshare collection journal article supplement (https://osapublishing.figshare.com/ndownloader/files/17819012)
Supplement: Supplementary file 1 [file 17819012]

solid testblock_holder
   facet normal 9.983120e-001 -5.807914e-002 0.000000e+000
      outer loop
         vertex 7.345194e+000 9.619697e+001 1.547382e+002
         vertex 7.345194e+000 9.619697e+001 1.147382e+002
         vertex 7.390771e+000 9.671792e+001 1.547382e+002
      endloop
   endfacet
   facet normal 9.932307e-001 -1.161583e-001 0.000000e+000
      outer loop
         vertex 7.390771e+000 9.671792e+001 1.547382e+002
         vertex 7.345194e+000 9.619697e+001 1.147382e+002
         vertex 7.390771e+000 9.671792e+001 1.147382e+002
      endloop
   endfacet
   facet normal 9.730600e-001 -2.305519e-001 0.000000e+000
      outer loop
         vertex 7.390771e+000 9.671792e+001 1.547382e+002
         vertex 7.390771e+000 9.671792e+001 1.147382e+002
         vertex 7.526116e+000 9.722304e+001 1.547382e+002
      endloop
   endfacet
   facet normal 9.579706e-001 -2.868663e-001 0.000000e+000
      outer loop
         vertex 7.526116e+000 9.722304e+001 1.547382e+002
         vertex 7.390771e+000 9.671792e+001 1.147382e+002
         vertex 7.526116e+000 9.722304e+001 1.147382e+002
      endloop
   endfacet
   facet normal 9.182422e-001 -3.960194e-001 0.000000e+000
      outer loop
         vertex 7.526116e+000 9.722304e+001 1.547382e+002
         vertex 7.526116e+000 9.722304e+001 1.147382e+002
         vertex 7.747118e+000 9.769698e+001 1.547382e+002
      endloop
   endfacet
   facet normal 8.936031e-001 -4.488580e-001 0.000000e+000
      outer loop
         vertex 7.747118e+000 9.769698e+001 1.547382e+002
         vertex 7.526116e+000 9.722304e+001 1.147382e+002
         vertex 7.747118e+000 9.769698e+001 1.147382e+002
      endloop
   endfacet
   facet normal 8.355240e-001 -5.494540e-001 0.000000e+000
      outer loop
         vertex 7.747118e+000 9.769698e+001 1.547382e+002
         vertex 7.747118e+000 9.769698e+001 1.147382e+002
         vertex 8.047061e+000 9.812534e+001 1.547382e+002
      endloop
   endfacet
   facet normal 8.020839e-001 -5.972114e-001 0.000000e+000
      outer loop
         vertex 8.047061e+000 9.812534e+001 1.547382e+002
         vertex 7.747118e+000 9.769698e+001 1.147382e+002
         vertex 8.047061e+000 9.812534e+001 1.147382e+002
      endloop
   endfacet
   facet normal 7.274188e-001 -6.861938e-001 0.000000e+000
      outer loop
         vertex 8.047061e+000 9.812534e+001 1.547382e+002
         vertex 8.047061e+000 9.812534e+001 1.147382e+002
         vertex 8.416832e+000 9.849510e+001 1.547382e+002
      endloop
   endfacet
   facet normal 6.861938e-001 -7.274188e-001 0.000000e+000
      outer loop
         vertex 8.416832e+000 9.849510e+001 1.547382e+002
         vertex 8.047061e+000 9.812534e+001 1.147382e+002
         vertex 8.416832e+000 9.849510e+001 1.147382e+002
      endloop
   endfacet
   facet normal 5.972114e-001 -8.020839e-001 0.000000e+000
      outer loop
         vertex 8.416832e+000 9.849510e+001 1.547382e+002
         vertex 8.416832e+000 9.849510e+001 1.147382e+002
         vertex 8.845194e+000 9.879505e+001 1.547382e+002
      endloop
   endfacet
   facet normal 5.494540e-001 -8.355240e-001 0.000000e+000
      outer loop
         vertex 8.845194e+000 9.879505e+001 1.547382e+002
         vertex 8.416832e+000 9.849510e+001 1.147382e+002
         vertex 8.845194e+000 9.879505e+001 1.147382e+002
      endloop
   endfacet
   facet normal 4.488580e-001 -8.936031e-001 0.000000e+000
      outer loop
         vertex 8.845194e+000 9.879505e+001 1.547382e+002
         vertex 8.845194e+000 9.879505e+001 1.147382e+002
         vertex 9.319134e+000 9.901604e+001 1.547382e+002
      endloop
   endfacet
   facet normal 3.960194e-001 -9.182422e-001 0.000000e+000
      outer loop
         vertex 9.319134e+000 9.901604e+001 1.547382e+002
         vertex 8.845194e+000 9.879505e+001 1.147382e+002
         vertex 9.319134e+000 9.901604e+001 1.147382e+002
      endloop
   endfacet
   facet normal 2.868663e-001 -9.579706e-001 0.000000e+000
      outer loop
         vertex 9.319134e+000 9.901604e+001 1.547382e+002
         vertex 9.319134e+000 9.901604e+001 1.147382e+002
         vertex 9.824250e+000 9.915140e+001 1.547382e+002
      endloop
   endfacet
   facet normal 2.305519e-001 -9.730600e-001 0.000000e+000
      outer loop
         vertex 9.824250e+000 9.915140e+001 1.547382e+002
         vertex 9.319134e+000 9.901604e+001 1.147382e+002
         vertex 9.824250e+000 9.915140e+001 1.147382e+002
      endloop
   endfacet
   facet normal 1.161583e-001 -9.932307e-001 0.000000e+000
      outer loop
         vertex 9.824250e+000 9.915140e+001 1.547382e+002
         vertex 9.824250e+000 9.915140e+001 1.147382e+002
         vertex 1.034519e+001 9.919697e+001 1.547382e+002
      endloop
   endfacet
   facet normal 5.807914e-002 -9.983120e-001 0.000000e+000
      outer loop
         vertex 1.034519e+001 9.919697e+001 1.547382e+002
         vertex 9.824250e+000 9.915140e+001 1.147382e+002
         vertex 1.034519e+001 9.919697e+001 1.147382e+002
      endloop
   endfacet
   facet normal -5.807914e-002 -9.983120e-001 0.000000e+000
      outer loop
         vertex 1.034519e+001 9.919697e+001 1.547382e+002
         vertex 1.034519e+001 9.919697e+001 1.147382e+002
         vertex 1.086614e+001 9.915140e+001 1.547382e+002
      endloop
   endfacet
   facet normal -1.161583e-001 -9.932307e-001 0.000000e+000
      outer loop
         vertex 1.086614e+001 9.915140e+001 1.547382e+002
         vertex 1.034519e+001 9.919697e+001 1.147382e+002
         vertex 1.086614e+001 9.915140e+001 1.147382e+002
      endloop
   endfacet
   facet normal -2.305519e-001 -9.730600e-001 0.000000e+000
      outer loop
         vertex 1.086614e+001 9.915140e+001 1.547382e+002
         vertex 1.086614e+001 9.915140e+001 1.147382e+002
         vertex 1.137125e+001 9.901604e+001 1.547382e+002
      endloop
   endfacet
   facet normal -2.868663e-001 -9.579706e-001 0.000000e+000
      outer loop
         vertex 1.137125e+001 9.901604e+001 1.547382e+002
         vertex 1.086614e+001 9.915140e+001 1.147382e+002
         vertex 1.137125e+001 9.901604e+001 1.147382e+002
      endloop
   endfacet
   facet normal -3.960194e-001 -9.182422e-001 0.000000e+000
      outer loop
         vertex 1.137125e+001 9.901604e+001 1.547382e+002
         vertex 1.137125e+001 9.901604e+001 1.147382e+002
         vertex 1.184519e+001 9.879505e+001 1.547382e+002
      endloop
   endfacet
   facet normal -4.488580e-001 -8.936031e-001 0.000000e+000
      outer loop
         vertex 1.184519e+001 9.879505e+001 1.547382e+002
         vertex 1.137125e+001 9.901604e+001 1.147382e+002
         vertex 1.184519e+001 9.879505e+001 1.147382e+002
      endloop
   endfacet
   facet normal -5.494540e-001 -8.355240e-001 0.000000e+000
      outer loop
         vertex 1.184519e+001 9.879505e+001 1.547382e+002
         vertex 1.184519e+001 9.879505e+001 1.147382e+002
         vertex 1.227356e+001 9.849510e+001 1.547382e+002
      endloop
   endfacet
   facet normal -5.972114e-001 -8.020839e-001 0.000000e+000
      outer loop
         vertex 1.227356e+001 9.849510e+001 1.547382e+002
         vertex 1.184519e+001 9.879505e+001 1.147382e+002
         vertex 1.227356e+001 9.849510e+001 1.147382e+002
      endloop
   endfacet
   facet normal -6.861938e-001 -7.274188e-001 0.000000e+000
      outer loop
         vertex 1.227356e+001 9.849510e+001 1.547382e+002
         vertex 1.227356e+001 9.849510e+001 1.147382e+002
         vertex 1.264333e+001 9.812534e+001 1.547382e+002
      endloop
   endfacet
   facet normal -7.274188e-001 -6.861938e-001 0.000000e+000
      outer loop
         vertex 1.264333e+001 9.812534e+001 1.547382e+002
         vertex 1.227356e+001 9.849510e+001 1.147382e+002
         vertex 1.264333e+001 9.812534e+001 1.147382e+002
      endloop
   endfacet
   facet normal -8.020839e-001 -5.972114e-001 0.000000e+000
      outer loop
         vertex 1.264333e+001 9.812534e+001 1.547382e+002
         vertex 1.264333e+001 9.812534e+001 1.147382e+002
         vertex 1.294327e+001 9.769698e+001 1.547382e+002
      endloop
   endfacet
   facet normal -8.355240e-001 -5.494540e-001 0.000000e+000
      outer loop
         vertex 1.294327e+001 9.769698e+001 1.547382e+002
         vertex 1.264333e+001 9.812534e+001 1.147382e+002
         vertex 1.294327e+001 9.769698e+001 1.147382e+002
      endloop
   endfacet
   facet normal -8.936031e-001 -4.488580e-001 0.000000e+000
      outer loop
         vertex 1.294327e+001 9.769698e+001 1.547382e+002
         vertex 1.294327e+001 9.769698e+001 1.147382e+002
         vertex 1.316427e+001 9.722304e+001 1.547382e+002
      endloop
   endfacet
   facet normal -9.182422e-001 -3.960194e-001 0.000000e+000
      outer loop
         vertex 1.316427e+001 9.722304e+001 1.547382e+002
         vertex 1.294327e+001 9.769698e+001 1.147382e+002
         vertex 1.316427e+001 9.722304e+001 1.147382e+002
      endloop
   endfacet
   facet normal -9.579706e-001 -2.868663e-001 0.000000e+000
      outer loop
         vertex 1.316427e+001 9.722304e+001 1.547382e+002
         vertex 1.316427e+001 9.722304e+001 1.147382e+002
         vertex 1.329962e+001 9.671792e+001 1.547382e+002
      endloop
   endfacet
   facet normal -9.730600e-001 -2.305519e-001 0.000000e+000
      outer loop
         vertex 1.329962e+001 9.671792e+001 1.547382e+002
         vertex 1.316427e+001 9.722304e+001 1.147382e+002
         vertex 1.329962e+001 9.671792e+001 1.147382e+002
      endloop
   endfacet
   facet normal -9.932307e-001 -1.161583e-001 0.000000e+000
      outer loop
         vertex 1.329962e+001 9.671792e+001 1.547382e+002
         vertex 1.329962e+001 9.671792e+001 1.147382e+002
         vertex 1.334519e+001 9.619697e+001 1.547382e+002
      endloop
   endfacet
   facet normal -9.983120e-001 -5.807914e-002 0.000000e+000
      outer loop
         vertex 1.334519e+001 9.619697e+001 1.547382e+002
         vertex 1.329962e+001 9.671792e+001 1.147382e+002
         vertex 1.334519e+001 9.619697e+001 1.147382e+002
      endloop
   endfacet
   facet normal 0.000000e+000 -1.000000e+000 0.000000e+000
      outer loop
         vertex 1.534519e+001 9.619697e+001 1.547382e+002
         vertex 1.334519e+001 9.619697e+001 1.547382e+002
         vertex 1.534519e+001 9.619697e+001 1.147382e+002
      endloop
   endfacet
   facet normal 0.000000e+000 -1.000000e+000 0.000000e+000
      outer loop
         vertex 1.534519e+001 9.619697e+001 1.147382e+002
         vertex 1.334519e+001 9.619697e+001 1.547382e+002
         vertex 1.334519e+001 9.619697e+001 1.147382e+002
      endloop
   endfacet
   facet normal -1.000000e+000 -1.190704e-016 0.000000e+000
      outer loop
         vertex 1.534519e+001 3.063698e+001 1.547382e+002
         vertex 1.534519e+001 9.619697e+001 1.547382e+002
         vertex 1.534519e+001 3.063698e+001 1.147382e+002
      endloop
   endfacet
   facet normal -1.000000e+000 -1.190704e-016 0.000000e+000
      outer loop
         vertex 1.534519e+001 3.063698e+001 1.147382e+002
         vertex 1.534519e+001 9.619697e+001 1.547382e+002
         vertex 1.534519e+001 9.619697e+001 1.147382e+002
      endloop
   endfacet
   facet normal 0.000000e+000 -1.000000e+000 0.000000e+000
      outer loop
         vertex 2.284519e+001 3.063698e+001 1.482382e+002
         vertex 1.534519e+001 3.063698e+001 1.547382e+002
         vertex 2.284519e+001 3.063698e+001 1.212382e+002
      endloop
   endfacet
   facet normal 0.000000e+000 -1.000000e+000 0.000000e+000
      outer loop
         vertex 2.284519e+001 3.063698e+001 1.212382e+002
         vertex 1.534519e+001 3.063698e+001 1.547382e+002
         vertex 1.534519e+001 3.063698e+001 1.147382e+002
      endloop
   endfacet
   facet normal 0.000000e+000 -1.000000e+000 0.000000e+000
      outer loop
         vertex 2.284519e+001 3.063698e+001 1.212382e+002
         vertex 1.534519e+001 3.063698e+001 1.147382e+002
         vertex 5.784520e+001 3.063698e+001 1.212382e+002
      endloop
   endfacet
   facet normal 0.000000e+000 -1.000000e+000 0.000000e+000
      outer loop
         vertex 5.784520e+001 3.063698e+001 1.212382e+002
         vertex 1.534519e+001 3.063698e+001 1.147382e+002
         vertex 6.534519e+001 3.063698e+001 1.147382e+002
      endloop
   endfacet
   facet normal 0.000000e+000 -1.000000e+000 0.000000e+000
      outer loop
         vertex 5.784520e+001 3.063698e+001 1.212382e+002
         vertex 6.534519e+001 3.063698e+001 1.147382e+002
         vertex 5.784520e+001 3.063698e+001 1.482382e+002
      endloop
   endfacet
   facet normal 0.000000e+000 -1.000000e+000 0.000000e+000
      outer loop
         vertex 5.784520e+001 3.063698e+001 1.482382e+002
         vertex 6.534519e+001 3.063698e+001 1.147382e+002
         vertex 6.534519e+001 3.063698e+001 1.547382e+002
      endloop
   endfacet
   facet normal 0.000000e+000 -1.000000e+000 0.000000e+000
      outer loop
         vertex 5.784520e+001 3.063698e+001 1.482382e+002
         vertex 6.534519e+001 3.063698e+001 1.547382e+002
         vertex 2.284519e+001 3.063698e+001 1.482382e+002
      endloop
   endfacet
   facet normal 0.000000e+000 -1.000000e+000 0.000000e+000
      outer loop
         vertex 2.284519e+001 3.063698e+001 1.482382e+002
         vertex 6.534519e+001 3.063698e+001 1.547382e+002
         vertex 1.534519e+001 3.063698e+001 1.547382e+002
      endloop
   endfacet
   facet normal 1.000000e+000 0.000000e+000 0.000000e+000
      outer loop
         vertex 6.534519e+001 9.619697e+001 1.547382e+002
         vertex 6.534519e+001 3.063698e+001 1.547382e+002
         vertex 6.534519e+001 9.619697e+001 1.147382e+002
      endloop
   endfacet
   facet normal 1.000000e+000 0.000000e+000 0.000000e+000
      outer loop
         vertex 6.534519e+001 9.619697e+001 1.147382e+002
         vertex 6.534519e+001 3.063698e+001 1.547382e+002
         vertex 6.534519e+001 3.063698e+001 1.147382e+002
      endloop
   endfacet
   facet normal 0.000000e+000 -1.000000e+000 0.000000e+000
      outer loop
         vertex 6.734519e+001 9.619697e+001 1.547382e+002
         vertex 6.534519e+001 9.619697e+001 1.547382e+002
         vertex 6.734519e+001 9.619697e+001 1.147382e+002
      endloop
   endfacet
   facet normal 0.000000e+000 -1.000000e+000 0.000000e+000
      outer loop
         vertex 6.734519e+001 9.619697e+001 1.147382e+002
         vertex 6.534519e+001 9.619697e+001 1.547382e+002
         vertex 6.534519e+001 9.619697e+001 1.147382e+002
      endloop
   endfacet
   facet normal 9.983120e-001 -5.807914e-002 0.000000e+000
      outer loop
         vertex 6.734519e+001 9.619697e+001 1.547382e+002
         vertex 6.734519e+001 9.619697e+001 1.147382e+002
         vertex 6.739077e+001 9.671792e+001 1.547382e+002
      endloop
   endfacet
   facet normal 9.932307e-001 -1.161583e-001 0.000000e+000
      outer loop
         vertex 6.739077e+001 9.671792e+001 1.547382e+002
         vertex 6.734519e+001 9.619697e+001 1.147382e+002
         vertex 6.739077e+001 9.671792e+001 1.147382e+002
      endloop
   endfacet
   facet normal 9.730600e-001 -2.305519e-001 0.000000e+000
      outer loop
         vertex 6.739077e+001 9.671792e+001 1.547382e+002
         vertex 6.739077e+001 9.671792e+001 1.147382e+002
         vertex 6.752612e+001 9.722304e+001 1.547382e+002
      endloop
   endfacet
   facet normal 9.579706e-001 -2.868663e-001 0.000000e+000
      outer loop
         vertex 6.752612e+001 9.722304e+001 1.547382e+002
         vertex 6.739077e+001 9.671792e+001 1.147382e+002
         vertex 6.752612e+001 9.722304e+001 1.147382e+002
      endloop
   endfacet
   facet normal 9.182422e-001 -3.960194e-001 0.000000e+000
      outer loop
         vertex 6.752612e+001 9.722304e+001 1.547382e+002
         vertex 6.752612e+001 9.722304e+001 1.147382e+002
         vertex 6.774712e+001 9.769698e+001 1.547382e+002
      endloop
   endfacet
   facet normal 8.936031e-001 -4.488580e-001 0.000000e+000
      outer loop
         vertex 6.774712e+001 9.769698e+001 1.547382e+002
         vertex 6.752612e+001 9.722304e+001 1.147382e+002
         vertex 6.774712e+001 9.769698e+001 1.147382e+002
      endloop
   endfacet
   facet normal 8.355240e-001 -5.494540e-001 0.000000e+000
      outer loop
         vertex 6.774712e+001 9.769698e+001 1.547382e+002
         vertex 6.774712e+001 9.769698e+001 1.147382e+002
         vertex 6.804706e+001 9.812534e+001 1.547382e+002
      endloop
   endfacet
   facet normal 8.020839e-001 -5.972114e-001 0.000000e+000
      outer loop
         vertex 6.804706e+001 9.812534e+001 1.547382e+002
         vertex 6.774712e+001 9.769698e+001 1.147382e+002
         vertex 6.804706e+001 9.812534e+001 1.147382e+002
      endloop
   endfacet
   facet normal 7.274188e-001 -6.861938e-001 0.000000e+000
      outer loop
         vertex 6.804706e+001 9.812534e+001 1.547382e+002
         vertex 6.804706e+001 9.812534e+001 1.147382e+002
         vertex 6.841682e+001 9.849510e+001 1.547382e+002
      endloop
   endfacet
   facet normal 6.861938e-001 -7.274188e-001 0.000000e+000
      outer loop
         vertex 6.841682e+001 9.849510e+001 1.547382e+002
         vertex 6.804706e+001 9.812534e+001 1.147382e+002
         vertex 6.841682e+001 9.849510e+001 1.147382e+002
      endloop
   endfacet
   facet normal 5.972114e-001 -8.020839e-001 0.000000e+000
      outer loop
         vertex 6.841682e+001 9.849510e+001 1.547382e+002
         vertex 6.841682e+001 9.849510e+001 1.147382e+002
         vertex 6.884519e+001 9.879505e+001 1.547382e+002
      endloop
   endfacet
   facet normal 5.494540e-001 -8.355240e-001 0.000000e+000
      outer loop
         vertex 6.884519e+001 9.879505e+001 1.547382e+002
         vertex 6.841682e+001 9.849510e+001 1.147382e+002
         vertex 6.884519e+001 9.879505e+001 1.147382e+002
      endloop
   endfacet
   facet normal 4.488580e-001 -8.936031e-001 0.000000e+000
      outer loop
         vertex 6.884519e+001 9.879505e+001 1.547382e+002
         vertex 6.884519e+001 9.879505e+001 1.147382e+002
         vertex 6.931913e+001 9.901604e+001 1.547382e+002
      endloop
   endfacet
   facet normal 3.960194e-001 -9.182422e-001 0.000000e+000
      outer loop
         vertex 6.931913e+001 9.901604e+001 1.547382e+002
         vertex 6.884519e+001 9.879505e+001 1.147382e+002
         vertex 6.931913e+001 9.901604e+001 1.147382e+002
      endloop
   endfacet
   facet normal 2.868663e-001 -9.579706e-001 0.000000e+000
      outer loop
         vertex 6.931913e+001 9.901604e+001 1.547382e+002
         vertex 6.931913e+001 9.901604e+001 1.147382e+002
         vertex 6.982425e+001 9.915140e+001 1.547382e+002
      endloop
   endfacet
   facet normal 2.305519e-001 -9.730600e-001 0.000000e+000
      outer loop
         vertex 6.982425e+001 9.915140e+001 1.547382e+002
         vertex 6.931913e+001 9.901604e+001 1.147382e+002
         vertex 6.982425e+001 9.915140e+001 1.147382e+002
      endloop
   endfacet
   facet normal 1.161583e-001 -9.932307e-001 0.000000e+000
      outer loop
         vertex 6.982425e+001 9.915140e+001 1.547382e+002
         vertex 6.982425e+001 9.915140e+001 1.147382e+002
         vertex 7.034519e+001 9.919697e+001 1.547382e+002
      endloop
   endfacet
   facet normal 5.807914e-002 -9.983120e-001 0.000000e+000
      outer loop
         vertex 7.034519e+001 9.919697e+001 1.547382e+002
         vertex 6.982425e+001 9.915140e+001 1.147382e+002
         vertex 7.034519e+001 9.919697e+001 1.147382e+002
      endloop
   endfacet
   facet normal -5.807914e-002 -9.983120e-001 0.000000e+000
      outer loop
         vertex 7.034519e+001 9.919697e+001 1.547382e+002
         vertex 7.034519e+001 9.919697e+001 1.147382e+002
         vertex 7.086613e+001 9.915140e+001 1.547382e+002
      endloop
   endfacet
   facet normal -1.161583e-001 -9.932307e-001 0.000000e+000
      outer loop
         vertex 7.086613e+001 9.915140e+001 1.547382e+002
         vertex 7.034519e+001 9.919697e+001 1.147382e+002
         vertex 7.086613e+001 9.915140e+001 1.147382e+002
      endloop
   endfacet
   facet normal -2.305519e-001 -9.730600e-001 0.000000e+000
      outer loop
         vertex 7.086613e+001 9.915140e+001 1.547382e+002
         vertex 7.086613e+001 9.915140e+001 1.147382e+002
         vertex 7.137125e+001 9.901604e+001 1.547382e+002
      endloop
   endfacet
   facet normal -2.868663e-001 -9.579706e-001 0.000000e+000
      outer loop
         vertex 7.137125e+001 9.901604e+001 1.547382e+002
         vertex 7.086613e+001 9.915140e+001 1.147382e+002
         vertex 7.137125e+001 9.901604e+001 1.147382e+002
      endloop
   endfacet
   facet normal -3.960194e-001 -9.182422e-001 0.000000e+000
      outer loop
         vertex 7.137125e+001 9.901604e+001 1.547382e+002
         vertex 7.137125e+001 9.901604e+001 1.147382e+002
         vertex 7.184520e+001 9.879505e+001 1.547382e+002
      endloop
   endfacet
   facet normal -4.488580e-001 -8.936031e-001 0.000000e+000
      outer loop
         vertex 7.184520e+001 9.879505e+001 1.547382e+002
         vertex 7.137125e+001 9.901604e+001 1.147382e+002
         vertex 7.184520e+001 9.879505e+001 1.147382e+002
      endloop
   endfacet
   facet normal -5.494540e-001 -8.355240e-001 0.000000e+000
      outer loop
         vertex 7.184520e+001 9.879505e+001 1.547382e+002
         vertex 7.184520e+001 9.879505e+001 1.147382e+002
         vertex 7.227355e+001 9.849510e+001 1.547382e+002
      endloop
   endfacet
   facet normal -5.972114e-001 -8.020839e-001 0.000000e+000
      outer loop
         vertex 7.227355e+001 9.849510e+001 1.547382e+002
         vertex 7.184520e+001 9.879505e+001 1.147382e+002
         vertex 7.227355e+001 9.849510e+001 1.147382e+002
      endloop
   endfacet
   facet normal -6.861938e-001 -7.274188e-001 0.000000e+000
      outer loop
         vertex 7.227355e+001 9.849510e+001 1.547382e+002
         vertex 7.227355e+001 9.849510e+001 1.147382e+002
         vertex 7.264333e+001 9.812534e+001 1.547382e+002
      endloop
   endfacet
   facet normal -7.274188e-001 -6.861938e-001 0.000000e+000
      outer loop
         vertex 7.264333e+001 9.812534e+001 1.547382e+002
         vertex 7.227355e+001 9.849510e+001 1.147382e+002
         vertex 7.264333e+001 9.812534e+001 1.147382e+002
      endloop
   endfacet
   facet normal -8.020839e-001 -5.972114e-001 0.000000e+000
      outer loop
         vertex 7.264333e+001 9.812534e+001 1.547382e+002
         vertex 7.264333e+001 9.812534e+001 1.147382e+002
         vertex 7.294327e+001 9.769698e+001 1.547382e+002
      endloop
   endfacet
   facet normal -8.355240e-001 -5.494540e-001 0.000000e+000
      outer loop
         vertex 7.294327e+001 9.769698e+001 1.547382e+002
         vertex 7.264333e+001 9.812534e+001 1.147382e+002
         vertex 7.294327e+001 9.769698e+001 1.147382e+002
      endloop
   endfacet
   facet normal -8.936031e-001 -4.488580e-001 0.000000e+000
      outer loop
         vertex 7.294327e+001 9.769698e+001 1.547382e+002
         vertex 7.294327e+001 9.769698e+001 1.147382e+002
         vertex 7.316427e+001 9.722304e+001 1.547382e+002
      endloop
   endfacet
   facet normal -9.182422e-001 -3.960194e-001 0.000000e+000
      outer loop
         vertex 7.316427e+001 9.722304e+001 1.547382e+002
         vertex 7.294327e+001 9.769698e+001 1.147382e+002
         vertex 7.316427e+001 9.722304e+001 1.147382e+002
      endloop
   endfacet
   facet normal -9.579706e-001 -2.868663e-001 0.000000e+000
      outer loop
         vertex 7.316427e+001 9.722304e+001 1.547382e+002
         vertex 7.316427e+001 9.722304e+001 1.147382e+002
         vertex 7.329961e+001 9.671792e+001 1.547382e+002
      endloop
   endfacet
   facet normal -9.730600e-001 -2.305519e-001 0.000000e+000
      outer loop
         vertex 7.329961e+001 9.671792e+001 1.547382e+002
         vertex 7.316427e+001 9.722304e+001 1.147382e+002
         vertex 7.329961e+001 9.671792e+001 1.147382e+002
      endloop
   endfacet
   facet normal -9.932307e-001 -1.161583e-001 0.000000e+000
      outer loop
         vertex 7.329961e+001 9.671792e+001 1.547382e+002
         vertex 7.329961e+001 9.671792e+001 1.147382e+002
         vertex 7.334519e+001 9.619697e+001 1.547382e+002
      endloop
   endfacet
   facet normal -9.983120e-001 -5.807914e-002 0.000000e+000
      outer loop
         vertex 7.334519e+001 9.619697e+001 1.547382e+002
         vertex 7.329961e+001 9.671792e+001 1.147382e+002
         vertex 7.334519e+001 9.619697e+001 1.147382e+002
      endloop
   endfacet
   facet normal 0.000000e+000 -1.000000e+000 0.000000e+000
      outer loop
         vertex 7.634519e+001 9.619697e+001 1.547382e+002
         vertex 7.334519e+001 9.619697e+001 1.547382e+002
         vertex 7.634519e+001 9.619697e+001 1.147382e+002
      endloop
   endfacet
   facet normal 0.000000e+000 -1.000000e+000 0.000000e+000
      outer loop
         vertex 7.634519e+001 9.619697e+001 1.147382e+002
         vertex 7.334519e+001 9.619697e+001 1.547382e+002
         vertex 7.334519e+001 9.619697e+001 1.147382e+002
      endloop
   endfacet
   facet normal 1.000000e+000 0.000000e+000 0.000000e+000
      outer loop
         vertex 7.634519e+001 1.051970e+002 1.547382e+002
         vertex 7.634519e+001 9.619697e+001 1.547382e+002
         vertex 7.634519e+001 1.051970e+002 1.147382e+002
      endloop
   endfacet
   facet normal 1.000000e+000 0.000000e+000 0.000000e+000
      outer loop
         vertex 7.634519e+001 1.051970e+002 1.147382e+002
         vertex 7.634519e+001 9.619697e+001 1.547382e+002
         vertex 7.634519e+001 9.619697e+001 1.147382e+002
      endloop
   endfacet
   facet normal 0.000000e+000 1.000000e+000 0.000000e+000
      outer loop
         vertex 7.334519e+001 1.051970e+002 1.547382e+002
         vertex 7.634519e+001 1.051970e+002 1.547382e+002
         vertex 7.334519e+001 1.051970e+002 1.147382e+002
      endloop
   endfacet
   facet normal 0.000000e+000 1.000000e+000 0.000000e+000
      outer loop
         vertex 7.334519e+001 1.051970e+002 1.147382e+002
         vertex 7.634519e+001 1.051970e+002 1.547382e+002
         vertex 7.634519e+001 1.051970e+002 1.147382e+002
      endloop
   endfacet
   facet normal -9.983120e-001 5.807914e-002 0.000000e+000
      outer loop
         vertex 7.334519e+001 1.051970e+002 1.547382e+002
         vertex 7.334519e+001 1.051970e+002 1.147382e+002
         vertex 7.329961e+001 1.046760e+002 1.547382e+002
      endloop
   endfacet
   facet normal -9.932307e-001 1.161583e-001 0.000000e+000
      outer loop
         vertex 7.329961e+001 1.046760e+002 1.547382e+002
         vertex 7.334519e+001 1.051970e+002 1.147382e+002
         vertex 7.329961e+001 1.046760e+002 1.147382e+002
      endloop
   endfacet
   facet normal -9.730600e-001 2.305519e-001 0.000000e+000
      outer loop
         vertex 7.329961e+001 1.046760e+002 1.547382e+002
         vertex 7.329961e+001 1.046760e+002 1.147382e+002
         vertex 7.316427e+001 1.041709e+002 1.547382e+002
      endloop
   endfacet
   facet normal -9.579706e-001 2.868663e-001 0.000000e+000
      outer loop
         vertex 7.316427e+001 1.041709e+002 1.547382e+002
         vertex 7.329961e+001 1.046760e+002 1.147382e+002
         vertex 7.316427e+001 1.041709e+002 1.147382e+002
      endloop
   endfacet
   facet normal -9.182422e-001 3.960194e-001 0.000000e+000
      outer loop
         vertex 7.316427e+001 1.041709e+002 1.547382e+002
         vertex 7.316427e+001 1.041709e+002 1.147382e+002
         vertex 7.294327e+001 1.036970e+002 1.547382e+002
      endloop
   endfacet
   facet normal -8.936031e-001 4.488580e-001 0.000000e+000
      outer loop
         vertex 7.294327e+001 1.036970e+002 1.547382e+002
         vertex 7.316427e+001 1.041709e+002 1.147382e+002
         vertex 7.294327e+001 1.036970e+002 1.147382e+002
      endloop
   endfacet
   facet normal -8.355240e-001 5.494540e-001 0.000000e+000
      outer loop
         vertex 7.294327e+001 1.036970e+002 1.547382e+002
         vertex 7.294327e+001 1.036970e+002 1.147382e+002
         vertex 7.264333e+001 1.032686e+002 1.547382e+002
      endloop
   endfacet
   facet normal -8.020839e-001 5.972114e-001 0.000000e+000
      outer loop
         vertex 7.264333e+001 1.032686e+002 1.547382e+002
         vertex 7.294327e+001 1.036970e+002 1.147382e+002
         vertex 7.264333e+001 1.032686e+002 1.147382e+002
      endloop
   endfacet
   facet normal -7.274188e-001 6.861938e-001 0.000000e+000
      outer loop
         vertex 7.264333e+001 1.032686e+002 1.547382e+002
         vertex 7.264333e+001 1.032686e+002 1.147382e+002
         vertex 7.227355e+001 1.028988e+002 1.547382e+002
      endloop
   endfacet
   facet normal -6.861938e-001 7.274188e-001 0.000000e+000
      outer loop
         vertex 7.227355e+001 1.028988e+002 1.547382e+002
         vertex 7.264333e+001 1.032686e+002 1.147382e+002
         vertex 7.227355e+001 1.028988e+002 1.147382e+002
      endloop
   endfacet
   facet normal -5.972114e-001 8.020839e-001 0.000000e+000
      outer loop
         vertex 7.227355e+001 1.028988e+002 1.547382e+002
         vertex 7.227355e+001 1.028988e+002 1.147382e+002
         vertex 7.184520e+001 1.025989e+002 1.547382e+002
      endloop
   endfacet
   facet normal -5.494540e-001 8.355240e-001 0.000000e+000
      outer loop
         vertex 7.184520e+001 1.025989e+002 1.547382e+002
         vertex 7.227355e+001 1.028988e+002 1.147382e+002
         vertex 7.184520e+001 1.025989e+002 1.147382e+002
      endloop
   endfacet
   facet normal -4.488580e-001 8.936031e-001 0.000000e+000
      outer loop
         vertex 7.184520e+001 1.025989e+002 1.547382e+002
         vertex 7.184520e+001 1.025989e+002 1.147382e+002
         vertex 7.137125e+001 1.023779e+002 1.547382e+002
      endloop
   endfacet
   facet normal -3.960194e-001 9.182422e-001 0.000000e+000
      outer loop
         vertex 7.137125e+001 1.023779e+002 1.547382e+002
         vertex 7.184520e+001 1.025989e+002 1.147382e+002
         vertex 7.137125e+001 1.023779e+002 1.147382e+002
      endloop
   endfacet
   facet normal -2.868663e-001 9.579706e-001 0.000000e+000
      outer loop
         vertex 7.137125e+001 1.023779e+002 1.547382e+002
         vertex 7.137125e+001 1.023779e+002 1.147382e+002
         vertex 7.086613e+001 1.022426e+002 1.547382e+002
      endloop
   endfacet
   facet normal -2.305519e-001 9.730600e-001 0.000000e+000
      outer loop
         vertex 7.086613e+001 1.022426e+002 1.547382e+002
         vertex 7.137125e+001 1.023779e+002 1.147382e+002
         vertex 7.086613e+001 1.022426e+002 1.147382e+002
      endloop
   endfacet
   facet normal -1.161583e-001 9.932307e-001 0.000000e+000
      outer loop
         vertex 7.086613e+001 1.022426e+002 1.547382e+002
         vertex 7.086613e+001 1.022426e+002 1.147382e+002
         vertex 7.034519e+001 1.021970e+002 1.547382e+002
      endloop
   endfacet
   facet normal -5.807914e-002 9.983120e-001 0.000000e+000
      outer loop
         vertex 7.034519e+001 1.021970e+002 1.547382e+002
         vertex 7.086613e+001 1.022426e+002 1.147382e+002
         vertex 7.034519e+001 1.021970e+002 1.147382e+002
      endloop
   endfacet
   facet normal 5.807914e-002 9.983120e-001 0.000000e+000
      outer loop
         vertex 7.034519e+001 1.021970e+002 1.547382e+002
         vertex 7.034519e+001 1.021970e+002 1.147382e+002
         vertex 6.982425e+001 1.022426e+002 1.547382e+002
      endloop
   endfacet
   facet normal 1.161583e-001 9.932307e-001 0.000000e+000
      outer loop
         vertex 6.982425e+001 1.022426e+002 1.547382e+002
         vertex 7.034519e+001 1.021970e+002 1.147382e+002
         vertex 6.982425e+001 1.022426e+002 1.147382e+002
      endloop
   endfacet
   facet normal 2.305519e-001 9.730600e-001 0.000000e+000
      outer loop
         vertex 6.982425e+001 1.022426e+002 1.547382e+002
         vertex 6.982425e+001 1.022426e+002 1.147382e+002
         vertex 6.931913e+001 1.023779e+002 1.547382e+002
      endloop
   endfacet
   facet normal 2.868663e-001 9.579706e-001 0.000000e+000
      outer loop
         vertex 6.931913e+001 1.023779e+002 1.547382e+002
         vertex 6.982425e+001 1.022426e+002 1.147382e+002
         vertex 6.931913e+001 1.023779e+002 1.147382e+002
      endloop
   endfacet
   facet normal 3.960194e-001 9.182422e-001 0.000000e+000
      outer loop
         vertex 6.931913e+001 1.023779e+002 1.547382e+002
         vertex 6.931913e+001 1.023779e+002 1.147382e+002
         vertex 6.884519e+001 1.025989e+002 1.547382e+002
      endloop
   endfacet
   facet normal 4.488580e-001 8.936031e-001 0.000000e+000
      outer loop
         vertex 6.884519e+001 1.025989e+002 1.547382e+002
         vertex 6.931913e+001 1.023779e+002 1.147382e+002
         vertex 6.884519e+001 1.025989e+002 1.147382e+002
      endloop
   endfacet
   facet normal 5.494540e-001 8.355240e-001 0.000000e+000
      outer loop
         vertex 6.884519e+001 1.025989e+002 1.547382e+002
         vertex 6.884519e+001 1.025989e+002 1.147382e+002
         vertex 6.841682e+001 1.028988e+002 1.547382e+002
      endloop
   endfacet
   facet normal 5.972114e-001 8.020839e-001 0.000000e+000
      outer loop
         vertex 6.841682e+001 1.028988e+002 1.547382e+002
         vertex 6.884519e+001 1.025989e+002 1.147382e+002
         vertex 6.841682e+001 1.028988e+002 1.147382e+002
      endloop
   endfacet
   facet normal 6.861938e-001 7.274188e-001 0.000000e+000
      outer loop
         vertex 6.841682e+001 1.028988e+002 1.547382e+002
         vertex 6.841682e+001 1.028988e+002 1.147382e+002
         vertex 6.804706e+001 1.032686e+002 1.547382e+002
      endloop
   endfacet
   facet normal 7.274188e-001 6.861938e-001 0.000000e+000
      outer loop
         vertex 6.804706e+001 1.032686e+002 1.547382e+002
         vertex 6.841682e+001 1.028988e+002 1.147382e+002
         vertex 6.804706e+001 1.032686e+002 1.147382e+002
      endloop
   endfacet
   facet normal 8.020839e-001 5.972114e-001 0.000000e+000
      outer loop
         vertex 6.804706e+001 1.032686e+002 1.547382e+002
         vertex 6.804706e+001 1.032686e+002 1.147382e+002
         vertex 6.774712e+001 1.036970e+002 1.547382e+002
      endloop
   endfacet
   facet normal 8.355240e-001 5.494540e-001 0.000000e+000
      outer loop
         vertex 6.774712e+001 1.036970e+002 1.547382e+002
         vertex 6.804706e+001 1.032686e+002 1.147382e+002
         vertex 6.774712e+001 1.036970e+002 1.147382e+002
      endloop
   endfacet
   facet normal 8.936031e-001 4.488580e-001 0.000000e+000
      outer loop
         vertex 6.774712e+001 1.036970e+002 1.547382e+002
         vertex 6.774712e+001 1.036970e+002 1.147382e+002
         vertex 6.752612e+001 1.041709e+002 1.547382e+002
      endloop
   endfacet
   facet normal 9.182422e-001 3.960194e-001 0.000000e+000
      outer loop
         vertex 6.752612e+001 1.041709e+002 1.547382e+002
         vertex 6.774712e+001 1.036970e+002 1.147382e+002
         vertex 6.752612e+001 1.041709e+002 1.147382e+002
      endloop
   endfacet
   facet normal 9.579706e-001 2.868663e-001 0.000000e+000
      outer loop
         vertex 6.752612e+001 1.041709e+002 1.547382e+002
         vertex 6.752612e+001 1.041709e+002 1.147382e+002
         vertex 6.739077e+001 1.046760e+002 1.547382e+002
      endloop
   endfacet
   facet normal 9.730600e-001 2.305519e-001 0.000000e+000
      outer loop
         vertex 6.739077e+001 1.046760e+002 1.547382e+002
         vertex 6.752612e+001 1.041709e+002 1.147382e+002
         vertex 6.739077e+001 1.046760e+002 1.147382e+002
      endloop
   endfacet
   facet normal 9.932307e-001 1.161583e-001 0.000000e+000
      outer loop
         vertex 6.739077e+001 1.046760e+002 1.547382e+002
         vertex 6.739077e+001 1.046760e+002 1.147382e+002
         vertex 6.734519e+001 1.051970e+002 1.547382e+002
      endloop
   endfacet
   facet normal 9.983120e-001 5.807914e-002 0.000000e+000
      outer loop
         vertex 6.734519e+001 1.051970e+002 1.547382e+002
         vertex 6.739077e+001 1.046760e+002 1.147382e+002
         vertex 6.734519e+001 1.051970e+002 1.147382e+002
      endloop
   endfacet
   facet normal 1.000000e+000 0.000000e+000 0.000000e+000
      outer loop
         vertex 6.534519e+001 1.707570e+002 1.247382e+002
         vertex 6.534519e+001 1.707570e+002 1.547382e+002
         vertex 6.534519e+001 1.051970e+002 1.247382e+002
      endloop
   endfacet
   facet normal 1.000000e+000 0.000000e+000 0.000000e+000
      outer loop
         vertex 6.534519e+001 1.051970e+002 1.247382e+002
         vertex 6.534519e+001 1.707570e+002 1.547382e+002
         vertex 6.534519e+001 1.051970e+002 1.547382e+002
      endloop
   endfacet
   facet normal 0.000000e+000 1.000000e+000 0.000000e+000
      outer loop
         vertex 1.534519e+001 1.707570e+002 1.247382e+002
         vertex 1.534519e+001 1.707570e+002 1.547382e+002
         vertex 6.534519e+001 1.707570e+002 1.247382e+002
      endloop
   endfacet
   facet normal 0.000000e+000 1.000000e+000 0.000000e+000
      outer loop
         vertex 6.534519e+001 1.707570e+002 1.247382e+002
         vertex 1.534519e+001 1.707570e+002 1.547382e+002
         vertex 6.534519e+001 1.707570e+002 1.547382e+002
      endloop
   endfacet
   facet normal -1.000000e+000 -1.323005e-017 0.000000e+000
      outer loop
         vertex 1.534519e+001 1.051970e+002 1.247382e+002
         vertex 1.534519e+001 1.051970e+002 1.547382e+002
         vertex 1.534519e+001 1.707570e+002 1.247382e+002
      endloop
   endfacet
   facet normal -1.000000e+000 -1.323005e-017 0.000000e+000
      outer loop
         vertex 1.534519e+001 1.707570e+002 1.247382e+002
         vertex 1.534519e+001 1.051970e+002 1.547382e+002
         vertex 1.534519e+001 1.707570e+002 1.547382e+002
      endloop
   endfacet
   facet normal 0.000000e+000 1.000000e+000 0.000000e+000
      outer loop
         vertex 1.334519e+001 1.051970e+002 1.547382e+002
         vertex 1.534519e+001 1.051970e+002 1.547382e+002
         vertex 1.534519e+001 1.051970e+002 1.247382e+002
      endloop
   endfacet
   facet normal 0.000000e+000 1.000000e+000 0.000000e+000
      outer loop
         vertex 6.534519e+001 1.051970e+002 1.547382e+002
         vertex 6.734519e+001 1.051970e+002 1.547382e+002
         vertex 6.534519e+001 1.051970e+002 1.247382e+002
      endloop
   endfacet
   facet normal 0.000000e+000 1.000000e+000 0.000000e+000
      outer loop
         vertex 6.534519e+001 1.051970e+002 1.247382e+002
         vertex 6.734519e+001 1.051970e+002 1.547382e+002
         vertex 6.734519e+001 1.051970e+002 1.147382e+002
      endloop
   endfacet
   facet normal 0.000000e+000 1.000000e+000 0.000000e+000
      outer loop
         vertex 1.334519e+001 1.051970e+002 1.547382e+002
         vertex 1.534519e+001 1.051970e+002 1.247382e+002
         vertex 1.334519e+001 1.051970e+002 1.147382e+002
      endloop
   endfacet
   facet normal 0.000000e+000 1.000000e+000 0.000000e+000
      outer loop
         vertex 1.334519e+001 1.051970e+002 1.147382e+002
         vertex 1.534519e+001 1.051970e+002 1.247382e+002
         vertex 1.917064e+001 1.051970e+002 1.247382e+002
      endloop
   endfacet
   facet normal 0.000000e+000 1.000000e+000 0.000000e+000
      outer loop
         vertex 1.334519e+001 1.051970e+002 1.147382e+002
         vertex 1.917064e+001 1.051970e+002 1.247382e+002
         vertex 6.734519e+001 1.051970e+002 1.147382e+002
      endloop
   endfacet
   facet normal 0.000000e+000 1.000000e+000 0.000000e+000
      outer loop
         vertex 6.734519e+001 1.051970e+002 1.147382e+002
         vertex 1.917064e+001 1.051970e+002 1.247382e+002
         vertex 6.151974e+001 1.051970e+002 1.247382e+002
      endloop
   endfacet
   facet normal 0.000000e+000 1.000000e+000 0.000000e+000
      outer loop
         vertex 6.734519e+001 1.051970e+002 1.147382e+002
         vertex 6.151974e+001 1.051970e+002 1.247382e+002
         vertex 6.534519e+001 1.051970e+002 1.247382e+002
      endloop
   endfacet
   facet normal -9.983120e-001 5.807914e-002 0.000000e+000
      outer loop
         vertex 1.334519e+001 1.051970e+002 1.547382e+002
         vertex 1.334519e+001 1.051970e+002 1.147382e+002
         vertex 1.329962e+001 1.046760e+002 1.547382e+002
      endloop
   endfacet
   facet normal -9.932307e-001 1.161583e-001 0.000000e+000
      outer loop
         vertex 1.329962e+001 1.046760e+002 1.547382e+002
         vertex 1.334519e+001 1.051970e+002 1.147382e+002
         vertex 1.329962e+001 1.046760e+002 1.147382e+002
      endloop
   endfacet
   facet normal -9.730600e-001 2.305519e-001 0.000000e+000
      outer loop
         vertex 1.329962e+001 1.046760e+002 1.547382e+002
         vertex 1.329962e+001 1.046760e+002 1.147382e+002
         vertex 1.316427e+001 1.041709e+002 1.547382e+002
      endloop
   endfacet
   facet normal -9.579706e-001 2.868663e-001 0.000000e+000
      outer loop
         vertex 1.316427e+001 1.041709e+002 1.547382e+002
         vertex 1.329962e+001 1.046760e+002 1.147382e+002
         vertex 1.316427e+001 1.041709e+002 1.147382e+002
      endloop
   endfacet
   facet normal -9.182422e-001 3.960194e-001 0.000000e+000
      outer loop
         vertex 1.316427e+001 1.041709e+002 1.547382e+002
         vertex 1.316427e+001 1.041709e+002 1.147382e+002
         vertex 1.294327e+001 1.036970e+002 1.547382e+002
      endloop
   endfacet
   facet normal -8.936031e-001 4.488580e-001 0.000000e+000
      outer loop
         vertex 1.294327e+001 1.036970e+002 1.547382e+002
         vertex 1.316427e+001 1.041709e+002 1.147382e+002
         vertex 1.294327e+001 1.036970e+002 1.147382e+002
      endloop
   endfacet
   facet normal -8.355240e-001 5.494540e-001 0.000000e+000
      outer loop
         vertex 1.294327e+001 1.036970e+002 1.547382e+002
         vertex 1.294327e+001 1.036970e+002 1.147382e+002
         vertex 1.264333e+001 1.032686e+002 1.547382e+002
      endloop
   endfacet
   facet normal -8.020839e-001 5.972114e-001 0.000000e+000
      outer loop
         vertex 1.264333e+001 1.032686e+002 1.547382e+002
         vertex 1.294327e+001 1.036970e+002 1.147382e+002
         vertex 1.264333e+001 1.032686e+002 1.147382e+002
      endloop
   endfacet
   facet normal -7.274188e-001 6.861938e-001 0.000000e+000
      outer loop
         vertex 1.264333e+001 1.032686e+002 1.547382e+002
         vertex 1.264333e+001 1.032686e+002 1.147382e+002
         vertex 1.227356e+001 1.028988e+002 1.547382e+002
      endloop
   endfacet
   facet normal -6.861938e-001 7.274188e-001 0.000000e+000
      outer loop
         vertex 1.227356e+001 1.028988e+002 1.547382e+002
         vertex 1.264333e+001 1.032686e+002 1.147382e+002
         vertex 1.227356e+001 1.028988e+002 1.147382e+002
      endloop
   endfacet
   facet normal -5.972114e-001 8.020839e-001 0.000000e+000
      outer loop
         vertex 1.227356e+001 1.028988e+002 1.547382e+002
         vertex 1.227356e+001 1.028988e+002 1.147382e+002
         vertex 1.184519e+001 1.025989e+002 1.547382e+002
      endloop
   endfacet
   facet normal -5.494540e-001 8.355240e-001 0.000000e+000
      outer loop
         vertex 1.184519e+001 1.025989e+002 1.547382e+002
         vertex 1.227356e+001 1.028988e+002 1.147382e+002
         vertex 1.184519e+001 1.025989e+002 1.147382e+002
      endloop
   endfacet
   facet normal -4.488580e-001 8.936031e-001 0.000000e+000
      outer loop
         vertex 1.184519e+001 1.025989e+002 1.547382e+002
         vertex 1.184519e+001 1.025989e+002 1.147382e+002
         vertex 1.137125e+001 1.023779e+002 1.547382e+002
      endloop
   endfacet
   facet normal -3.960194e-001 9.182422e-001 0.000000e+000
      outer loop
         vertex 1.137125e+001 1.023779e+002 1.547382e+002
         vertex 1.184519e+001 1.025989e+002 1.147382e+002
         vertex 1.137125e+001 1.023779e+002 1.147382e+002
      endloop
   endfacet
   facet normal -2.868663e-001 9.579706e-001 0.000000e+000
      outer loop
         vertex 1.137125e+001 1.023779e+002 1.547382e+002
         vertex 1.137125e+001 1.023779e+002 1.147382e+002
         vertex 1.086614e+001 1.022426e+002 1.547382e+002
      endloop
   endfacet
   facet normal -2.305519e-001 9.730600e-001 0.000000e+000
      outer loop
         vertex 1.086614e+001 1.022426e+002 1.547382e+002
         vertex 1.137125e+001 1.023779e+002 1.147382e+002
         vertex 1.086614e+001 1.022426e+002 1.147382e+002
      endloop
   endfacet
   facet normal -1.161583e-001 9.932307e-001 0.000000e+000
      outer loop
         vertex 1.086614e+001 1.022426e+002 1.547382e+002
         vertex 1.086614e+001 1.022426e+002 1.147382e+002
         vertex 1.034519e+001 1.021970e+002 1.547382e+002
      endloop
   endfacet
   facet normal -5.807914e-002 9.983120e-001 0.000000e+000
      outer loop
         vertex 1.034519e+001 1.021970e+002 1.547382e+002
         vertex 1.086614e+001 1.022426e+002 1.147382e+002
         vertex 1.034519e+001 1.021970e+002 1.147382e+002
      endloop
   endfacet
   facet normal 5.807914e-002 9.983120e-001 0.000000e+000
      outer loop
         vertex 1.034519e+001 1.021970e+002 1.547382e+002
         vertex 1.034519e+001 1.021970e+002 1.147382e+002
         vertex 9.824250e+000 1.022426e+002 1.547382e+002
      endloop
   endfacet
   facet normal 1.161583e-001 9.932307e-001 0.000000e+000
      outer loop
         vertex 9.824250e+000 1.022426e+002 1.547382e+002
         vertex 1.034519e+001 1.021970e+002 1.147382e+002
         vertex 9.824250e+000 1.022426e+002 1.147382e+002
      endloop
   endfacet
   facet normal 2.305519e-001 9.730600e-001 0.000000e+000
      outer loop
         vertex 9.824250e+000 1.022426e+002 1.547382e+002
         vertex 9.824250e+000 1.022426e+002 1.147382e+002
         vertex 9.319134e+000 1.023779e+002 1.547382e+002
      endloop
   endfacet
   facet normal 2.868663e-001 9.579706e-001 0.000000e+000
      outer loop
         vertex 9.319134e+000 1.023779e+002 1.547382e+002
         vertex 9.824250e+000 1.022426e+002 1.147382e+002
         vertex 9.319134e+000 1.023779e+002 1.147382e+002
      endloop
   endfacet
   facet normal 3.960194e-001 9.182422e-001 0.000000e+000
      outer loop
         vertex 9.319134e+000 1.023779e+002 1.547382e+002
         vertex 9.319134e+000 1.023779e+002 1.147382e+002
         vertex 8.845194e+000 1.025989e+002 1.547382e+002
      endloop
   endfacet
   facet normal 4.488580e-001 8.936031e-001 0.000000e+000
      outer loop
         vertex 8.845194e+000 1.025989e+002 1.547382e+002
         vertex 9.319134e+000 1.023779e+002 1.147382e+002
         vertex 8.845194e+000 1.025989e+002 1.147382e+002
      endloop
   endfacet
   facet normal 5.494540e-001 8.355240e-001 0.000000e+000
      outer loop
         vertex 8.845194e+000 1.025989e+002 1.547382e+002
         vertex 8.845194e+000 1.025989e+002 1.147382e+002
         vertex 8.416832e+000 1.028988e+002 1.547382e+002
      endloop
   endfacet
   facet normal 5.972114e-001 8.020839e-001 0.000000e+000
      outer loop
         vertex 8.416832e+000 1.028988e+002 1.547382e+002
         vertex 8.845194e+000 1.025989e+002 1.147382e+002
         vertex 8.416832e+000 1.028988e+002 1.147382e+002
      endloop
   endfacet
   facet normal 6.861938e-001 7.274188e-001 0.000000e+000
      outer loop
         vertex 8.416832e+000 1.028988e+002 1.547382e+002
         vertex 8.416832e+000 1.028988e+002 1.147382e+002
         vertex 8.047061e+000 1.032686e+002 1.547382e+002
      endloop
   endfacet
   facet normal 7.274188e-001 6.861938e-001 0.000000e+000
      outer loop
         vertex 8.047061e+000 1.032686e+002 1.547382e+002
         vertex 8.416832e+000 1.028988e+002 1.147382e+002
         vertex 8.047061e+000 1.032686e+002 1.147382e+002
      endloop
   endfacet
   facet normal 8.020839e-001 5.972114e-001 0.000000e+000
      outer loop
         vertex 8.047061e+000 1.032686e+002 1.547382e+002
         vertex 8.047061e+000 1.032686e+002 1.147382e+002
         vertex 7.747118e+000 1.036970e+002 1.547382e+002
      endloop
   endfacet
   facet normal 8.355240e-001 5.494540e-001 0.000000e+000
      outer loop
         vertex 7.747118e+000 1.036970e+002 1.547382e+002
         vertex 8.047061e+000 1.032686e+002 1.147382e+002
         vertex 7.747118e+000 1.036970e+002 1.147382e+002
      endloop
   endfacet
   facet normal 8.936031e-001 4.488580e-001 0.000000e+000
      outer loop
         vertex 7.747118e+000 1.036970e+002 1.547382e+002
         vertex 7.747118e+000 1.036970e+002 1.147382e+002
         vertex 7.526116e+000 1.041709e+002 1.547382e+002
      endloop
   endfacet
   facet normal 9.182422e-001 3.960194e-001 0.000000e+000
      outer loop
         vertex 7.526116e+000 1.041709e+002 1.547382e+002
         vertex 7.747118e+000 1.036970e+002 1.147382e+002
         vertex 7.526116e+000 1.041709e+002 1.147382e+002
      endloop
   endfacet
   facet normal 9.579706e-001 2.868663e-001 0.000000e+000
      outer loop
         vertex 7.526116e+000 1.041709e+002 1.547382e+002
         vertex 7.526116e+000 1.041709e+002 1.147382e+002
         vertex 7.390771e+000 1.046760e+002 1.547382e+002
      endloop
   endfacet
   facet normal 9.730600e-001 2.305519e-001 0.000000e+000
      outer loop
         vertex 7.390771e+000 1.046760e+002 1.547382e+002
         vertex 7.526116e+000 1.041709e+002 1.147382e+002
         vertex 7.390771e+000 1.046760e+002 1.147382e+002
      endloop
   endfacet
   facet normal 9.932307e-001 1.161583e-001 0.000000e+000
      outer loop
         vertex 7.390771e+000 1.046760e+002 1.547382e+002
         vertex 7.390771e+000 1.046760e+002 1.147382e+002
         vertex 7.345194e+000 1.051970e+002 1.547382e+002
      endloop
   endfacet
   facet normal 9.983120e-001 5.807914e-002 0.000000e+000
      outer loop
         vertex 7.345194e+000 1.051970e+002 1.547382e+002
         vertex 7.390771e+000 1.046760e+002 1.147382e+002
         vertex 7.345194e+000 1.051970e+002 1.147382e+002
      endloop
   endfacet
   facet normal 0.000000e+000 1.000000e+000 0.000000e+000
      outer loop
         vertex 4.345194e+000 1.051970e+002 1.547382e+002
         vertex 7.345194e+000 1.051970e+002 1.547382e+002
         vertex 4.345194e+000 1.051970e+002 1.147382e+002
      endloop
   endfacet
   facet normal 0.000000e+000 1.000000e+000 0.000000e+000
      outer loop
         vertex 4.345194e+000 1.051970e+002 1.147382e+002
         vertex 7.345194e+000 1.051970e+002 1.547382e+002
         vertex 7.345194e+000 1.051970e+002 1.147382e+002
      endloop
   endfacet
   facet normal -1.000000e+000 0.000000e+000 0.000000e+000
      outer loop
         vertex 4.345194e+000 9.619697e+001 1.547382e+002
         vertex 4.345194e+000 1.051970e+002 1.547382e+002
         vertex 4.345194e+000 9.619697e+001 1.147382e+002
      endloop
   endfacet
   facet normal -1.000000e+000 0.000000e+000 0.000000e+000
      outer loop
         vertex 4.345194e+000 9.619697e+001 1.147382e+002
         vertex 4.345194e+000 1.051970e+002 1.547382e+002
         vertex 4.345194e+000 1.051970e+002 1.147382e+002
      endloop
   endfacet
   facet normal 0.000000e+000 -1.000000e+000 0.000000e+000
      outer loop
         vertex 7.345194e+000 9.619697e+001 1.547382e+002
         vertex 4.345194e+000 9.619697e+001 1.547382e+002
         vertex 7.345194e+000 9.619697e+001 1.147382e+002
      endloop
   endfacet
   facet normal 0.000000e+000 -1.000000e+000 0.000000e+000
      outer loop
         vertex 7.345194e+000 9.619697e+001 1.147382e+002
         vertex 4.345194e+000 9.619697e+001 1.547382e+002
         vertex 4.345194e+000 9.619697e+001 1.147382e+002
      endloop
   endfacet
   facet normal 0.000000e+000 0.000000e+000 1.000000e+000
      outer loop
         vertex 1.534519e+001 1.051970e+002 1.547382e+002
         vertex 1.864699e+001 3.393877e+001 1.547382e+002
         vertex 1.864699e+001 1.678070e+002 1.547382e+002
      endloop
   endfacet
   facet normal 0.000000e+000 0.000000e+000 1.000000e+000
      outer loop
         vertex 6.534519e+001 9.619697e+001 1.547382e+002
         vertex 6.204340e+001 1.678070e+002 1.547382e+002
         vertex 6.204340e+001 3.393877e+001 1.547382e+002
      endloop
   endfacet
   facet normal 0.000000e+000 0.000000e+000 1.000000e+000
      outer loop
         vertex 7.390771e+000 1.046760e+002 1.547382e+002
         vertex 7.345194e+000 1.051970e+002 1.547382e+002
         vertex 4.345194e+000 1.051970e+002 1.547382e+002
      endloop
   endfacet
   facet normal 0.000000e+000 0.000000e+000 1.000000e+000
      outer loop
         vertex 6.534519e+001 9.619697e+001 1.547382e+002
         vertex 6.534519e+001 1.051970e+002 1.547382e+002
         vertex 6.204340e+001 1.678070e+002 1.547382e+002
      endloop
   endfacet
   facet normal 0.000000e+000 0.000000e+000 1.000000e+000
      outer loop
         vertex 6.204340e+001 1.678070e+002 1.547382e+002
         vertex 6.534519e+001 1.051970e+002 1.547382e+002
         vertex 6.534519e+001 1.707570e+002 1.547382e+002
      endloop
   endfacet
   facet normal 0.000000e+000 0.000000e+000 1.000000e+000
      outer loop
         vertex 6.204340e+001 1.678070e+002 1.547382e+002
         vertex 6.534519e+001 1.707570e+002 1.547382e+002
         vertex 1.864699e+001 1.678070e+002 1.547382e+002
      endloop
   endfacet
   facet normal 0.000000e+000 0.000000e+000 1.000000e+000
      outer loop
         vertex 1.864699e+001 1.678070e+002 1.547382e+002
         vertex 6.534519e+001 1.707570e+002 1.547382e+002
         vertex 1.534519e+001 1.707570e+002 1.547382e+002
      endloop
   endfacet
   facet normal 0.000000e+000 0.000000e+000 1.000000e+000
      outer loop
         vertex 1.864699e+001 1.678070e+002 1.547382e+002
         vertex 1.534519e+001 1.707570e+002 1.547382e+002
         vertex 1.534519e+001 1.051970e+002 1.547382e+002
      endloop
   endfacet
   facet normal 0.000000e+000 0.000000e+000 1.000000e+000
      outer loop
         vertex 1.534519e+001 1.051970e+002 1.547382e+002
         vertex 1.534519e+001 9.619697e+001 1.547382e+002
         vertex 1.864699e+001 3.393877e+001 1.547382e+002
      endloop
   endfacet
   facet normal 0.000000e+000 0.000000e+000 1.000000e+000
      outer loop
         vertex 1.864699e+001 3.393877e+001 1.547382e+002
         vertex 1.534519e+001 9.619697e+001 1.547382e+002
         vertex 1.534519e+001 3.063698e+001 1.547382e+002
      endloop
   endfacet
   facet normal 0.000000e+000 0.000000e+000 1.000000e+000
      outer loop
         vertex 1.864699e+001 3.393877e+001 1.547382e+002
         vertex 1.534519e+001 3.063698e+001 1.547382e+002
         vertex 6.204340e+001 3.393877e+001 1.547382e+002
      endloop
   endfacet
   facet normal 0.000000e+000 0.000000e+000 1.000000e+000
      outer loop
         vertex 6.204340e+001 3.393877e+001 1.547382e+002
         vertex 1.534519e+001 3.063698e+001 1.547382e+002
         vertex 6.534519e+001 3.063698e+001 1.547382e+002
      endloop
   endfacet
   facet normal 0.000000e+000 0.000000e+000 1.000000e+000
      outer loop
         vertex 6.204340e+001 3.393877e+001 1.547382e+002
         vertex 6.534519e+001 3.063698e+001 1.547382e+002
         vertex 6.534519e+001 9.619697e+001 1.547382e+002
      endloop
   endfacet
   facet normal 0.000000e+000 0.000000e+000 1.000000e+000
      outer loop
         vertex 6.734519e+001 1.051970e+002 1.547382e+002
         vertex 6.534519e+001 1.051970e+002 1.547382e+002
         vertex 6.739077e+001 1.046760e+002 1.547382e+002
      endloop
   endfacet
   facet normal 0.000000e+000 0.000000e+000 1.000000e+000
      outer loop
         vertex 6.739077e+001 1.046760e+002 1.547382e+002
         vertex 6.534519e+001 1.051970e+002 1.547382e+002
         vertex 6.752612e+001 1.041709e+002 1.547382e+002
      endloop
   endfacet
   facet normal 0.000000e+000 0.000000e+000 1.000000e+000
      outer loop
         vertex 7.334519e+001 9.619697e+001 1.547382e+002
         vertex 7.634519e+001 9.619697e+001 1.547382e+002
         vertex 7.329961e+001 9.671792e+001 1.547382e+002
      endloop
   endfacet
   facet normal 0.000000e+000 0.000000e+000 1.000000e+000
      outer loop
         vertex 7.329961e+001 9.671792e+001 1.547382e+002
         vertex 7.634519e+001 9.619697e+001 1.547382e+002
         vertex 7.316427e+001 9.722304e+001 1.547382e+002
      endloop
   endfacet
   facet normal 0.000000e+000 0.000000e+000 1.000000e+000
      outer loop
         vertex 4.345194e+000 9.619697e+001 1.547382e+002
         vertex 8.845194e+000 1.025989e+002 1.547382e+002
         vertex 8.416832e+000 1.028988e+002 1.547382e+002
      endloop
   endfacet
   facet normal 0.000000e+000 0.000000e+000 1.000000e+000
      outer loop
         vertex 4.345194e+000 9.619697e+001 1.547382e+002
         vertex 7.345194e+000 9.619697e+001 1.547382e+002
         vertex 7.390771e+000 9.671792e+001 1.547382e+002
      endloop
   endfacet
   facet normal 0.000000e+000 0.000000e+000 1.000000e+000
      outer loop
         vertex 7.634519e+001 1.051970e+002 1.547382e+002
         vertex 7.334519e+001 1.051970e+002 1.547382e+002
         vertex 7.329961e+001 1.046760e+002 1.547382e+002
      endloop
   endfacet
   facet normal 0.000000e+000 0.000000e+000 1.000000e+000
      outer loop
         vertex 7.316427e+001 9.722304e+001 1.547382e+002
         vertex 7.634519e+001 9.619697e+001 1.547382e+002
         vertex 7.294327e+001 9.769698e+001 1.547382e+002
      endloop
   endfacet
   facet normal 0.000000e+000 0.000000e+000 1.000000e+000
      outer loop
         vertex 7.294327e+001 9.769698e+001 1.547382e+002
         vertex 7.634519e+001 9.619697e+001 1.547382e+002
         vertex 7.634519e+001 1.051970e+002 1.547382e+002
      endloop
   endfacet
   facet normal 0.000000e+000 0.000000e+000 1.000000e+000
      outer loop
         vertex 7.294327e+001 9.769698e+001 1.547382e+002
         vertex 7.634519e+001 1.051970e+002 1.547382e+002
         vertex 7.264333e+001 9.812534e+001 1.547382e+002
      endloop
   endfacet
   facet normal 0.000000e+000 0.000000e+000 1.000000e+000
      outer loop
         vertex 1.334519e+001 1.051970e+002 1.547382e+002
         vertex 1.329962e+001 1.046760e+002 1.547382e+002
         vertex 1.534519e+001 1.051970e+002 1.547382e+002
      endloop
   endfacet
   facet normal 0.000000e+000 0.000000e+000 1.000000e+000
      outer loop
         vertex 1.534519e+001 1.051970e+002 1.547382e+002
         vertex 1.329962e+001 1.046760e+002 1.547382e+002
         vertex 1.316427e+001 1.041709e+002 1.547382e+002
      endloop
   endfacet
   facet normal 0.000000e+000 0.000000e+000 1.000000e+000
      outer loop
         vertex 1.534519e+001 1.051970e+002 1.547382e+002
         vertex 1.316427e+001 1.041709e+002 1.547382e+002
         vertex 1.534519e+001 9.619697e+001 1.547382e+002
      endloop
   endfacet
   facet normal 0.000000e+000 0.000000e+000 1.000000e+000
      outer loop
         vertex 1.534519e+001 9.619697e+001 1.547382e+002
         vertex 1.316427e+001 1.041709e+002 1.547382e+002
         vertex 1.294327e+001 1.036970e+002 1.547382e+002
      endloop
   endfacet
   facet normal 0.000000e+000 0.000000e+000 1.000000e+000
      outer loop
         vertex 1.534519e+001 9.619697e+001 1.547382e+002
         vertex 1.294327e+001 1.036970e+002 1.547382e+002
         vertex 1.264333e+001 1.032686e+002 1.547382e+002
      endloop
   endfacet
   facet normal 0.000000e+000 0.000000e+000 1.000000e+000
      outer loop
         vertex 7.390771e+000 9.671792e+001 1.547382e+002
         vertex 7.526116e+000 9.722304e+001 1.547382e+002
         vertex 4.345194e+000 9.619697e+001 1.547382e+002
      endloop
   endfacet
   facet normal 0.000000e+000 0.000000e+000 1.000000e+000
      outer loop
         vertex 4.345194e+000 9.619697e+001 1.547382e+002
         vertex 7.526116e+000 9.722304e+001 1.547382e+002
         vertex 7.747118e+000 9.769698e+001 1.547382e+002
      endloop
   endfacet
   facet normal 0.000000e+000 0.000000e+000 1.000000e+000
      outer loop
         vertex 4.345194e+000 9.619697e+001 1.547382e+002
         vertex 7.747118e+000 9.769698e+001 1.547382e+002
         vertex 8.845194e+000 1.025989e+002 1.547382e+002
      endloop
   endfacet
   facet normal 0.000000e+000 0.000000e+000 1.000000e+000
      outer loop
         vertex 8.845194e+000 1.025989e+002 1.547382e+002
         vertex 7.747118e+000 9.769698e+001 1.547382e+002
         vertex 8.047061e+000 9.812534e+001 1.547382e+002
      endloop
   endfacet
   facet normal 0.000000e+000 0.000000e+000 1.000000e+000
      outer loop
         vertex 8.845194e+000 1.025989e+002 1.547382e+002
         vertex 8.047061e+000 9.812534e+001 1.547382e+002
         vertex 8.416832e+000 9.849510e+001 1.547382e+002
      endloop
   endfacet
   facet normal 0.000000e+000 0.000000e+000 1.000000e+000
      outer loop
         vertex 9.824250e+000 9.915140e+001 1.547382e+002
         vertex 9.319134e+000 1.023779e+002 1.547382e+002
         vertex 9.319134e+000 9.901604e+001 1.547382e+002
      endloop
   endfacet
   facet normal 0.000000e+000 0.000000e+000 1.000000e+000
      outer loop
         vertex 9.319134e+000 9.901604e+001 1.547382e+002
         vertex 9.319134e+000 1.023779e+002 1.547382e+002
         vertex 8.845194e+000 1.025989e+002 1.547382e+002
      endloop
   endfacet
   facet normal 0.000000e+000 0.000000e+000 1.000000e+000
      outer loop
         vertex 9.319134e+000 9.901604e+001 1.547382e+002
         vertex 8.845194e+000 1.025989e+002 1.547382e+002
         vertex 8.845194e+000 9.879505e+001 1.547382e+002
      endloop
   endfacet
   facet normal 0.000000e+000 0.000000e+000 1.000000e+000
      outer loop
         vertex 8.845194e+000 9.879505e+001 1.547382e+002
         vertex 8.845194e+000 1.025989e+002 1.547382e+002
         vertex 8.416832e+000 9.849510e+001 1.547382e+002
      endloop
   endfacet
   facet normal 0.000000e+000 0.000000e+000 1.000000e+000
      outer loop
         vertex 1.137125e+001 9.901604e+001 1.547382e+002
         vertex 1.137125e+001 1.023779e+002 1.547382e+002
         vertex 1.086614e+001 9.915140e+001 1.547382e+002
      endloop
   endfacet
   facet normal 0.000000e+000 0.000000e+000 1.000000e+000
      outer loop
         vertex 1.086614e+001 9.915140e+001 1.547382e+002
         vertex 1.137125e+001 1.023779e+002 1.547382e+002
         vertex 1.086614e+001 1.022426e+002 1.547382e+002
      endloop
   endfacet
   facet normal 0.000000e+000 0.000000e+000 1.000000e+000
      outer loop
         vertex 1.086614e+001 9.915140e+001 1.547382e+002
         vertex 1.086614e+001 1.022426e+002 1.547382e+002
         vertex 1.034519e+001 9.919697e+001 1.547382e+002
      endloop
   endfacet
   facet normal 0.000000e+000 0.000000e+000 1.000000e+000
      outer loop
         vertex 1.034519e+001 9.919697e+001 1.547382e+002
         vertex 1.086614e+001 1.022426e+002 1.547382e+002
         vertex 1.034519e+001 1.021970e+002 1.547382e+002
      endloop
   endfacet
   facet normal 0.000000e+000 0.000000e+000 1.000000e+000
      outer loop
         vertex 1.034519e+001 9.919697e+001 1.547382e+002
         vertex 1.034519e+001 1.021970e+002 1.547382e+002
         vertex 9.824250e+000 9.915140e+001 1.547382e+002
      endloop
   endfacet
   facet normal 0.000000e+000 0.000000e+000 1.000000e+000
      outer loop
         vertex 9.824250e+000 9.915140e+001 1.547382e+002
         vertex 1.034519e+001 1.021970e+002 1.547382e+002
         vertex 9.824250e+000 1.022426e+002 1.547382e+002
      endloop
   endfacet
   facet normal 0.000000e+000 0.000000e+000 1.000000e+000
      outer loop
         vertex 9.824250e+000 9.915140e+001 1.547382e+002
         vertex 9.824250e+000 1.022426e+002 1.547382e+002
         vertex 9.319134e+000 1.023779e+002 1.547382e+002
      endloop
   endfacet
   facet normal 0.000000e+000 0.000000e+000 1.000000e+000
      outer loop
         vertex 8.416832e+000 1.028988e+002 1.547382e+002
         vertex 8.047061e+000 1.032686e+002 1.547382e+002
         vertex 4.345194e+000 9.619697e+001 1.547382e+002
      endloop
   endfacet
   facet normal 0.000000e+000 0.000000e+000 1.000000e+000
      outer loop
         vertex 4.345194e+000 9.619697e+001 1.547382e+002
         vertex 8.047061e+000 1.032686e+002 1.547382e+002
         vertex 7.747118e+000 1.036970e+002 1.547382e+002
      endloop
   endfacet
   facet normal 0.000000e+000 0.000000e+000 1.000000e+000
      outer loop
         vertex 4.345194e+000 9.619697e+001 1.547382e+002
         vertex 7.747118e+000 1.036970e+002 1.547382e+002
         vertex 4.345194e+000 1.051970e+002 1.547382e+002
      endloop
   endfacet
   facet normal 0.000000e+000 0.000000e+000 1.000000e+000
      outer loop
         vertex 4.345194e+000 1.051970e+002 1.547382e+002
         vertex 7.747118e+000 1.036970e+002 1.547382e+002
         vertex 7.526116e+000 1.041709e+002 1.547382e+002
      endloop
   endfacet
   facet normal 0.000000e+000 0.000000e+000 1.000000e+000
      outer loop
         vertex 4.345194e+000 1.051970e+002 1.547382e+002
         vertex 7.526116e+000 1.041709e+002 1.547382e+002
         vertex 7.390771e+000 1.046760e+002 1.547382e+002
      endloop
   endfacet
   facet normal 0.000000e+000 0.000000e+000 1.000000e+000
      outer loop
         vertex 6.534519e+001 1.051970e+002 1.547382e+002
         vertex 6.804706e+001 9.812534e+001 1.547382e+002
         vertex 6.841682e+001 9.849510e+001 1.547382e+002
      endloop
   endfacet
   facet normal 0.000000e+000 0.000000e+000 1.000000e+000
      outer loop
         vertex 6.734519e+001 9.619697e+001 1.547382e+002
         vertex 6.739077e+001 9.671792e+001 1.547382e+002
         vertex 6.534519e+001 9.619697e+001 1.547382e+002
      endloop
   endfacet
   facet normal 0.000000e+000 0.000000e+000 1.000000e+000
      outer loop
         vertex 6.534519e+001 9.619697e+001 1.547382e+002
         vertex 6.739077e+001 9.671792e+001 1.547382e+002
         vertex 6.752612e+001 9.722304e+001 1.547382e+002
      endloop
   endfacet
   facet normal 0.000000e+000 0.000000e+000 1.000000e+000
      outer loop
         vertex 6.534519e+001 9.619697e+001 1.547382e+002
         vertex 6.752612e+001 9.722304e+001 1.547382e+002
         vertex 6.534519e+001 1.051970e+002 1.547382e+002
      endloop
   endfacet
   facet normal 0.000000e+000 0.000000e+000 1.000000e+000
      outer loop
         vertex 6.534519e+001 1.051970e+002 1.547382e+002
         vertex 6.752612e+001 9.722304e+001 1.547382e+002
         vertex 6.774712e+001 9.769698e+001 1.547382e+002
      endloop
   endfacet
   facet normal 0.000000e+000 0.000000e+000 1.000000e+000
      outer loop
         vertex 6.534519e+001 1.051970e+002 1.547382e+002
         vertex 6.774712e+001 9.769698e+001 1.547382e+002
         vertex 6.804706e+001 9.812534e+001 1.547382e+002
      endloop
   endfacet
   facet normal 0.000000e+000 0.000000e+000 1.000000e+000
      outer loop
         vertex 7.227355e+001 1.028988e+002 1.547382e+002
         vertex 7.184520e+001 1.025989e+002 1.547382e+002
         vertex 7.264333e+001 9.812534e+001 1.547382e+002
      endloop
   endfacet
   facet normal 0.000000e+000 0.000000e+000 1.000000e+000
      outer loop
         vertex 1.264333e+001 1.032686e+002 1.547382e+002
         vertex 1.227356e+001 1.028988e+002 1.547382e+002
         vertex 1.534519e+001 9.619697e+001 1.547382e+002
      endloop
   endfacet
   facet normal 0.000000e+000 0.000000e+000 1.000000e+000
      outer loop
         vertex 1.534519e+001 9.619697e+001 1.547382e+002
         vertex 1.227356e+001 1.028988e+002 1.547382e+002
         vertex 1.184519e+001 1.025989e+002 1.547382e+002
      endloop
   endfacet
   facet normal 0.000000e+000 0.000000e+000 1.000000e+000
      outer loop
         vertex 1.534519e+001 9.619697e+001 1.547382e+002
         vertex 1.184519e+001 1.025989e+002 1.547382e+002
         vertex 1.137125e+001 1.023779e+002 1.547382e+002
      endloop
   endfacet
   facet normal 0.000000e+000 0.000000e+000 1.000000e+000
      outer loop
         vertex 1.137125e+001 9.901604e+001 1.547382e+002
         vertex 1.184519e+001 9.879505e+001 1.547382e+002
         vertex 1.137125e+001 1.023779e+002 1.547382e+002
      endloop
   endfacet
   facet normal 0.000000e+000 0.000000e+000 1.000000e+000
      outer loop
         vertex 1.137125e+001 1.023779e+002 1.547382e+002
         vertex 1.184519e+001 9.879505e+001 1.547382e+002
         vertex 1.227356e+001 9.849510e+001 1.547382e+002
      endloop
   endfacet
   facet normal 0.000000e+000 0.000000e+000 1.000000e+000
      outer loop
         vertex 1.137125e+001 1.023779e+002 1.547382e+002
         vertex 1.227356e+001 9.849510e+001 1.547382e+002
         vertex 1.264333e+001 9.812534e+001 1.547382e+002
      endloop
   endfacet
   facet normal 0.000000e+000 0.000000e+000 1.000000e+000
      outer loop
         vertex 7.329961e+001 1.046760e+002 1.547382e+002
         vertex 7.316427e+001 1.041709e+002 1.547382e+002
         vertex 7.634519e+001 1.051970e+002 1.547382e+002
      endloop
   endfacet
   facet normal 0.000000e+000 0.000000e+000 1.000000e+000
      outer loop
         vertex 7.634519e+001 1.051970e+002 1.547382e+002
         vertex 7.316427e+001 1.041709e+002 1.547382e+002
         vertex 7.294327e+001 1.036970e+002 1.547382e+002
      endloop
   endfacet
   facet normal 0.000000e+000 0.000000e+000 1.000000e+000
      outer loop
         vertex 7.634519e+001 1.051970e+002 1.547382e+002
         vertex 7.294327e+001 1.036970e+002 1.547382e+002
         vertex 7.264333e+001 9.812534e+001 1.547382e+002
      endloop
   endfacet
   facet normal 0.000000e+000 0.000000e+000 1.000000e+000
      outer loop
         vertex 7.264333e+001 9.812534e+001 1.547382e+002
         vertex 7.294327e+001 1.036970e+002 1.547382e+002
         vertex 7.264333e+001 1.032686e+002 1.547382e+002
      endloop
   endfacet
   facet normal 0.000000e+000 0.000000e+000 1.000000e+000
      outer loop
         vertex 7.264333e+001 9.812534e+001 1.547382e+002
         vertex 7.264333e+001 1.032686e+002 1.547382e+002
         vertex 7.227355e+001 1.028988e+002 1.547382e+002
      endloop
   endfacet
   facet normal 0.000000e+000 0.000000e+000 1.000000e+000
      outer loop
         vertex 1.264333e+001 9.812534e+001 1.547382e+002
         vertex 1.294327e+001 9.769698e+001 1.547382e+002
         vertex 1.137125e+001 1.023779e+002 1.547382e+002
      endloop
   endfacet
   facet normal 0.000000e+000 0.000000e+000 1.000000e+000
      outer loop
         vertex 1.137125e+001 1.023779e+002 1.547382e+002
         vertex 1.294327e+001 9.769698e+001 1.547382e+002
         vertex 1.316427e+001 9.722304e+001 1.547382e+002
      endloop
   endfacet
   facet normal 0.000000e+000 0.000000e+000 1.000000e+000
      outer loop
         vertex 1.137125e+001 1.023779e+002 1.547382e+002
         vertex 1.316427e+001 9.722304e+001 1.547382e+002
         vertex 1.534519e+001 9.619697e+001 1.547382e+002
      endloop
   endfacet
   facet normal 0.000000e+000 0.000000e+000 1.000000e+000
      outer loop
         vertex 1.534519e+001 9.619697e+001 1.547382e+002
         vertex 1.316427e+001 9.722304e+001 1.547382e+002
         vertex 1.329962e+001 9.671792e+001 1.547382e+002
      endloop
   endfacet
   facet normal 0.000000e+000 0.000000e+000 1.000000e+000
      outer loop
         vertex 1.534519e+001 9.619697e+001 1.547382e+002
         vertex 1.329962e+001 9.671792e+001 1.547382e+002
         vertex 1.334519e+001 9.619697e+001 1.547382e+002
      endloop
   endfacet
   facet normal 0.000000e+000 0.000000e+000 1.000000e+000
      outer loop
         vertex 7.086613e+001 9.915140e+001 1.547382e+002
         vertex 7.137125e+001 9.901604e+001 1.547382e+002
         vertex 7.086613e+001 1.022426e+002 1.547382e+002
      endloop
   endfacet
   facet normal 0.000000e+000 0.000000e+000 1.000000e+000
      outer loop
         vertex 7.086613e+001 1.022426e+002 1.547382e+002
         vertex 7.137125e+001 9.901604e+001 1.547382e+002
         vertex 7.137125e+001 1.023779e+002 1.547382e+002
      endloop
   endfacet
   facet normal 0.000000e+000 0.000000e+000 1.000000e+000
      outer loop
         vertex 7.137125e+001 1.023779e+002 1.547382e+002
         vertex 7.137125e+001 9.901604e+001 1.547382e+002
         vertex 7.184520e+001 9.879505e+001 1.547382e+002
      endloop
   endfacet
   facet normal 0.000000e+000 0.000000e+000 1.000000e+000
      outer loop
         vertex 7.137125e+001 1.023779e+002 1.547382e+002
         vertex 7.184520e+001 9.879505e+001 1.547382e+002
         vertex 7.184520e+001 1.025989e+002 1.547382e+002
      endloop
   endfacet
   facet normal 0.000000e+000 0.000000e+000 1.000000e+000
      outer loop
         vertex 7.184520e+001 1.025989e+002 1.547382e+002
         vertex 7.184520e+001 9.879505e+001 1.547382e+002
         vertex 7.227355e+001 9.849510e+001 1.547382e+002
      endloop
   endfacet
   facet normal 0.000000e+000 0.000000e+000 1.000000e+000
      outer loop
         vertex 7.184520e+001 1.025989e+002 1.547382e+002
         vertex 7.227355e+001 9.849510e+001 1.547382e+002
         vertex 7.264333e+001 9.812534e+001 1.547382e+002
      endloop
   endfacet
   facet normal 0.000000e+000 0.000000e+000 1.000000e+000
      outer loop
         vertex 6.841682e+001 9.849510e+001 1.547382e+002
         vertex 6.931913e+001 1.023779e+002 1.547382e+002
         vertex 6.884519e+001 1.025989e+002 1.547382e+002
      endloop
   endfacet
   facet normal 0.000000e+000 0.000000e+000 1.000000e+000
      outer loop
         vertex 6.841682e+001 9.849510e+001 1.547382e+002
         vertex 6.884519e+001 9.879505e+001 1.547382e+002
         vertex 6.931913e+001 1.023779e+002 1.547382e+002
      endloop
   endfacet
   facet normal 0.000000e+000 0.000000e+000 1.000000e+000
      outer loop
         vertex 6.931913e+001 1.023779e+002 1.547382e+002
         vertex 6.884519e+001 9.879505e+001 1.547382e+002
         vertex 6.931913e+001 9.901604e+001 1.547382e+002
      endloop
   endfacet
   facet normal 0.000000e+000 0.000000e+000 1.000000e+000
      outer loop
         vertex 6.931913e+001 1.023779e+002 1.547382e+002
         vertex 6.931913e+001 9.901604e+001 1.547382e+002
         vertex 6.982425e+001 9.915140e+001 1.547382e+002
      endloop
   endfacet
   facet normal 0.000000e+000 0.000000e+000 1.000000e+000
      outer loop
         vertex 7.086613e+001 9.915140e+001 1.547382e+002
         vertex 7.086613e+001 1.022426e+002 1.547382e+002
         vertex 7.034519e+001 9.919697e+001 1.547382e+002
      endloop
   endfacet
   facet normal 0.000000e+000 0.000000e+000 1.000000e+000
      outer loop
         vertex 7.034519e+001 9.919697e+001 1.547382e+002
         vertex 7.086613e+001 1.022426e+002 1.547382e+002
         vertex 7.034519e+001 1.021970e+002 1.547382e+002
      endloop
   endfacet
   facet normal 0.000000e+000 0.000000e+000 1.000000e+000
      outer loop
         vertex 7.034519e+001 9.919697e+001 1.547382e+002
         vertex 7.034519e+001 1.021970e+002 1.547382e+002
         vertex 6.982425e+001 9.915140e+001 1.547382e+002
      endloop
   endfacet
   facet normal 0.000000e+000 0.000000e+000 1.000000e+000
      outer loop
         vertex 6.982425e+001 9.915140e+001 1.547382e+002
         vertex 7.034519e+001 1.021970e+002 1.547382e+002
         vertex 6.982425e+001 1.022426e+002 1.547382e+002
      endloop
   endfacet
   facet normal 0.000000e+000 0.000000e+000 1.000000e+000
      outer loop
         vertex 6.982425e+001 9.915140e+001 1.547382e+002
         vertex 6.982425e+001 1.022426e+002 1.547382e+002
         vertex 6.931913e+001 1.023779e+002 1.547382e+002
      endloop
   endfacet
   facet normal 0.000000e+000 0.000000e+000 1.000000e+000
      outer loop
         vertex 6.884519e+001 1.025989e+002 1.547382e+002
         vertex 6.841682e+001 1.028988e+002 1.547382e+002
         vertex 6.841682e+001 9.849510e+001 1.547382e+002
      endloop
   endfacet
   facet normal 0.000000e+000 0.000000e+000 1.000000e+000
      outer loop
         vertex 6.841682e+001 9.849510e+001 1.547382e+002
         vertex 6.841682e+001 1.028988e+002 1.547382e+002
         vertex 6.804706e+001 1.032686e+002 1.547382e+002
      endloop
   endfacet
   facet normal 0.000000e+000 0.000000e+000 1.000000e+000
      outer loop
         vertex 6.841682e+001 9.849510e+001 1.547382e+002
         vertex 6.804706e+001 1.032686e+002 1.547382e+002
         vertex 6.534519e+001 1.051970e+002 1.547382e+002
      endloop
   endfacet
   facet normal 0.000000e+000 0.000000e+000 1.000000e+000
      outer loop
         vertex 6.534519e+001 1.051970e+002 1.547382e+002
         vertex 6.804706e+001 1.032686e+002 1.547382e+002
         vertex 6.774712e+001 1.036970e+002 1.547382e+002
      endloop
   endfacet
   facet normal 0.000000e+000 0.000000e+000 1.000000e+000
      outer loop
         vertex 6.534519e+001 1.051970e+002 1.547382e+002
         vertex 6.774712e+001 1.036970e+002 1.547382e+002
         vertex 6.752612e+001 1.041709e+002 1.547382e+002
      endloop
   endfacet
   facet normal 0.000000e+000 0.000000e+000 -1.000000e+000
      outer loop
         vertex 6.134519e+001 1.011970e+002 1.147382e+002
         vertex 1.934519e+001 1.011970e+002 1.147382e+002
         vertex 1.334519e+001 1.051970e+002 1.147382e+002
      endloop
   endfacet
   facet normal 0.000000e+000 0.000000e+000 -1.000000e+000
      outer loop
         vertex 7.390771e+000 9.671792e+001 1.147382e+002
         vertex 7.345194e+000 9.619697e+001 1.147382e+002
         vertex 4.345194e+000 9.619697e+001 1.147382e+002
      endloop
   endfacet
   facet normal 0.000000e+000 0.000000e+000 -1.000000e+000
      outer loop
         vertex 1.334519e+001 1.051970e+002 1.147382e+002
         vertex 6.734519e+001 1.051970e+002 1.147382e+002
         vertex 6.134519e+001 1.011970e+002 1.147382e+002
      endloop
   endfacet
   facet normal 0.000000e+000 0.000000e+000 -1.000000e+000
      outer loop
         vertex 6.134519e+001 1.011970e+002 1.147382e+002
         vertex 6.734519e+001 1.051970e+002 1.147382e+002
         vertex 6.739077e+001 1.046760e+002 1.147382e+002
      endloop
   endfacet
   facet normal 0.000000e+000 0.000000e+000 -1.000000e+000
      outer loop
         vertex 6.134519e+001 1.011970e+002 1.147382e+002
         vertex 6.739077e+001 1.046760e+002 1.147382e+002
         vertex 6.752612e+001 1.041709e+002 1.147382e+002
      endloop
   endfacet
   facet normal 0.000000e+000 0.000000e+000 -1.000000e+000
      outer loop
         vertex 6.134519e+001 1.011970e+002 1.147382e+002
         vertex 6.534519e+001 9.619697e+001 1.147382e+002
         vertex 6.134519e+001 3.463697e+001 1.147382e+002
      endloop
   endfacet
   facet normal 0.000000e+000 0.000000e+000 -1.000000e+000
      outer loop
         vertex 6.134519e+001 3.463697e+001 1.147382e+002
         vertex 6.534519e+001 9.619697e+001 1.147382e+002
         vertex 6.534519e+001 3.063698e+001 1.147382e+002
      endloop
   endfacet
   facet normal 0.000000e+000 0.000000e+000 -1.000000e+000
      outer loop
         vertex 6.134519e+001 3.463697e+001 1.147382e+002
         vertex 6.534519e+001 3.063698e+001 1.147382e+002
         vertex 1.934519e+001 3.463697e+001 1.147382e+002
      endloop
   endfacet
   facet normal 0.000000e+000 0.000000e+000 -1.000000e+000
      outer loop
         vertex 1.934519e+001 3.463697e+001 1.147382e+002
         vertex 6.534519e+001 3.063698e+001 1.147382e+002
         vertex 1.534519e+001 3.063698e+001 1.147382e+002
      endloop
   endfacet
   facet normal 0.000000e+000 0.000000e+000 -1.000000e+000
      outer loop
         vertex 1.934519e+001 3.463697e+001 1.147382e+002
         vertex 1.534519e+001 3.063698e+001 1.147382e+002
         vertex 1.934519e+001 1.011970e+002 1.147382e+002
      endloop
   endfacet
   facet normal 0.000000e+000 0.000000e+000 -1.000000e+000
      outer loop
         vertex 1.934519e+001 1.011970e+002 1.147382e+002
         vertex 1.534519e+001 3.063698e+001 1.147382e+002
         vertex 1.534519e+001 9.619697e+001 1.147382e+002
      endloop
   endfacet
   facet normal 0.000000e+000 0.000000e+000 -1.000000e+000
      outer loop
         vertex 1.534519e+001 9.619697e+001 1.147382e+002
         vertex 1.334519e+001 9.619697e+001 1.147382e+002
         vertex 1.329962e+001 9.671792e+001 1.147382e+002
      endloop
   endfacet
   facet normal 0.000000e+000 0.000000e+000 -1.000000e+000
      outer loop
         vertex 1.294327e+001 1.036970e+002 1.147382e+002
         vertex 1.316427e+001 1.041709e+002 1.147382e+002
         vertex 1.934519e+001 1.011970e+002 1.147382e+002
      endloop
   endfacet
   facet normal 0.000000e+000 0.000000e+000 -1.000000e+000
      outer loop
         vertex 1.934519e+001 1.011970e+002 1.147382e+002
         vertex 1.316427e+001 1.041709e+002 1.147382e+002
         vertex 1.329962e+001 1.046760e+002 1.147382e+002
      endloop
   endfacet
   facet normal 0.000000e+000 0.000000e+000 -1.000000e+000
      outer loop
         vertex 1.934519e+001 1.011970e+002 1.147382e+002
         vertex 1.329962e+001 1.046760e+002 1.147382e+002
         vertex 1.334519e+001 1.051970e+002 1.147382e+002
      endloop
   endfacet
   facet normal 0.000000e+000 0.000000e+000 -1.000000e+000
      outer loop
         vertex 4.345194e+000 1.051970e+002 1.147382e+002
         vertex 7.345194e+000 1.051970e+002 1.147382e+002
         vertex 7.390771e+000 1.046760e+002 1.147382e+002
      endloop
   endfacet
   facet normal 0.000000e+000 0.000000e+000 -1.000000e+000
      outer loop
         vertex 4.345194e+000 1.051970e+002 1.147382e+002
         vertex 8.845194e+000 9.879505e+001 1.147382e+002
         vertex 8.416832e+000 9.849510e+001 1.147382e+002
      endloop
   endfacet
   facet normal 0.000000e+000 0.000000e+000 -1.000000e+000
      outer loop
         vertex 7.334519e+001 9.619697e+001 1.147382e+002
         vertex 7.329961e+001 9.671792e+001 1.147382e+002
         vertex 7.634519e+001 9.619697e+001 1.147382e+002
      endloop
   endfacet
   facet normal 0.000000e+000 0.000000e+000 -1.000000e+000
      outer loop
         vertex 7.634519e+001 9.619697e+001 1.147382e+002
         vertex 7.329961e+001 9.671792e+001 1.147382e+002
         vertex 7.316427e+001 9.722304e+001 1.147382e+002
      endloop
   endfacet
   facet normal 0.000000e+000 0.000000e+000 -1.000000e+000
      outer loop
         vertex 7.634519e+001 9.619697e+001 1.147382e+002
         vertex 7.316427e+001 9.722304e+001 1.147382e+002
         vertex 7.634519e+001 1.051970e+002 1.147382e+002
      endloop
   endfacet
   facet normal 0.000000e+000 0.000000e+000 -1.000000e+000
      outer loop
         vertex 7.634519e+001 1.051970e+002 1.147382e+002
         vertex 7.316427e+001 9.722304e+001 1.147382e+002
         vertex 7.294327e+001 9.769698e+001 1.147382e+002
      endloop
   endfacet
   facet normal 0.000000e+000 0.000000e+000 -1.000000e+000
      outer loop
         vertex 7.634519e+001 1.051970e+002 1.147382e+002
         vertex 7.294327e+001 9.769698e+001 1.147382e+002
         vertex 7.264333e+001 9.812534e+001 1.147382e+002
      endloop
   endfacet
   facet normal 0.000000e+000 0.000000e+000 -1.000000e+000
      outer loop
         vertex 7.334519e+001 1.051970e+002 1.147382e+002
         vertex 7.634519e+001 1.051970e+002 1.147382e+002
         vertex 7.329961e+001 1.046760e+002 1.147382e+002
      endloop
   endfacet
   facet normal 0.000000e+000 0.000000e+000 -1.000000e+000
      outer loop
         vertex 7.329961e+001 1.046760e+002 1.147382e+002
         vertex 7.634519e+001 1.051970e+002 1.147382e+002
         vertex 7.316427e+001 1.041709e+002 1.147382e+002
      endloop
   endfacet
   facet normal 0.000000e+000 0.000000e+000 -1.000000e+000
      outer loop
         vertex 1.534519e+001 9.619697e+001 1.147382e+002
         vertex 1.329962e+001 9.671792e+001 1.147382e+002
         vertex 1.934519e+001 1.011970e+002 1.147382e+002
      endloop
   endfacet
   facet normal 0.000000e+000 0.000000e+000 -1.000000e+000
      outer loop
         vertex 1.934519e+001 1.011970e+002 1.147382e+002
         vertex 1.329962e+001 9.671792e+001 1.147382e+002
         vertex 1.316427e+001 9.722304e+001 1.147382e+002
      endloop
   endfacet
   facet normal 0.000000e+000 0.000000e+000 -1.000000e+000
      outer loop
         vertex 1.934519e+001 1.011970e+002 1.147382e+002
         vertex 1.316427e+001 9.722304e+001 1.147382e+002
         vertex 1.294327e+001 9.769698e+001 1.147382e+002
      endloop
   endfacet
   facet normal 0.000000e+000 0.000000e+000 -1.000000e+000
      outer loop
         vertex 6.841682e+001 9.849510e+001 1.147382e+002
         vertex 6.804706e+001 9.812534e+001 1.147382e+002
         vertex 6.134519e+001 1.011970e+002 1.147382e+002
      endloop
   endfacet
   facet normal 0.000000e+000 0.000000e+000 -1.000000e+000
      outer loop
         vertex 9.824250e+000 9.915140e+001 1.147382e+002
         vertex 9.319134e+000 9.901604e+001 1.147382e+002
         vertex 8.845194e+000 1.025989e+002 1.147382e+002
      endloop
   endfacet
   facet normal 0.000000e+000 0.000000e+000 -1.000000e+000
      outer loop
         vertex 8.845194e+000 1.025989e+002 1.147382e+002
         vertex 9.319134e+000 9.901604e+001 1.147382e+002
         vertex 8.845194e+000 9.879505e+001 1.147382e+002
      endloop
   endfacet
   facet normal 0.000000e+000 0.000000e+000 -1.000000e+000
      outer loop
         vertex 8.845194e+000 1.025989e+002 1.147382e+002
         vertex 8.845194e+000 9.879505e+001 1.147382e+002
         vertex 8.416832e+000 1.028988e+002 1.147382e+002
      endloop
   endfacet
   facet normal 0.000000e+000 0.000000e+000 -1.000000e+000
      outer loop
         vertex 8.416832e+000 9.849510e+001 1.147382e+002
         vertex 8.047061e+000 9.812534e+001 1.147382e+002
         vertex 4.345194e+000 1.051970e+002 1.147382e+002
      endloop
   endfacet
   facet normal 0.000000e+000 0.000000e+000 -1.000000e+000
      outer loop
         vertex 4.345194e+000 1.051970e+002 1.147382e+002
         vertex 8.047061e+000 9.812534e+001 1.147382e+002
         vertex 7.747118e+000 9.769698e+001 1.147382e+002
      endloop
   endfacet
   facet normal 0.000000e+000 0.000000e+000 -1.000000e+000
      outer loop
         vertex 4.345194e+000 1.051970e+002 1.147382e+002
         vertex 7.747118e+000 9.769698e+001 1.147382e+002
         vertex 4.345194e+000 9.619697e+001 1.147382e+002
      endloop
   endfacet
   facet normal 0.000000e+000 0.000000e+000 -1.000000e+000
      outer loop
         vertex 4.345194e+000 9.619697e+001 1.147382e+002
         vertex 7.747118e+000 9.769698e+001 1.147382e+002
         vertex 7.526116e+000 9.722304e+001 1.147382e+002
      endloop
   endfacet
   facet normal 0.000000e+000 0.000000e+000 -1.000000e+000
      outer loop
         vertex 4.345194e+000 9.619697e+001 1.147382e+002
         vertex 7.526116e+000 9.722304e+001 1.147382e+002
         vertex 7.390771e+000 9.671792e+001 1.147382e+002
      endloop
   endfacet
   facet normal 0.000000e+000 0.000000e+000 -1.000000e+000
      outer loop
         vertex 8.845194e+000 1.025989e+002 1.147382e+002
         vertex 9.319134e+000 1.023779e+002 1.147382e+002
         vertex 9.824250e+000 9.915140e+001 1.147382e+002
      endloop
   endfacet
   facet normal 0.000000e+000 0.000000e+000 -1.000000e+000
      outer loop
         vertex 9.824250e+000 9.915140e+001 1.147382e+002
         vertex 9.319134e+000 1.023779e+002 1.147382e+002
         vertex 9.824250e+000 1.022426e+002 1.147382e+002
      endloop
   endfacet
   facet normal 0.000000e+000 0.000000e+000 -1.000000e+000
      outer loop
         vertex 9.824250e+000 9.915140e+001 1.147382e+002
         vertex 9.824250e+000 1.022426e+002 1.147382e+002
         vertex 1.034519e+001 9.919697e+001 1.147382e+002
      endloop
   endfacet
   facet normal 0.000000e+000 0.000000e+000 -1.000000e+000
      outer loop
         vertex 1.034519e+001 9.919697e+001 1.147382e+002
         vertex 9.824250e+000 1.022426e+002 1.147382e+002
         vertex 1.034519e+001 1.021970e+002 1.147382e+002
      endloop
   endfacet
   facet normal 0.000000e+000 0.000000e+000 -1.000000e+000
      outer loop
         vertex 1.034519e+001 9.919697e+001 1.147382e+002
         vertex 1.034519e+001 1.021970e+002 1.147382e+002
         vertex 1.086614e+001 9.915140e+001 1.147382e+002
      endloop
   endfacet
   facet normal 0.000000e+000 0.000000e+000 -1.000000e+000
      outer loop
         vertex 6.804706e+001 9.812534e+001 1.147382e+002
         vertex 6.774712e+001 9.769698e+001 1.147382e+002
         vertex 6.134519e+001 1.011970e+002 1.147382e+002
      endloop
   endfacet
   facet normal 0.000000e+000 0.000000e+000 -1.000000e+000
      outer loop
         vertex 6.134519e+001 1.011970e+002 1.147382e+002
         vertex 6.774712e+001 9.769698e+001 1.147382e+002
         vertex 6.752612e+001 9.722304e+001 1.147382e+002
      endloop
   endfacet
   facet normal 0.000000e+000 0.000000e+000 -1.000000e+000
      outer loop
         vertex 6.134519e+001 1.011970e+002 1.147382e+002
         vertex 6.752612e+001 9.722304e+001 1.147382e+002
         vertex 6.534519e+001 9.619697e+001 1.147382e+002
      endloop
   endfacet
   facet normal 0.000000e+000 0.000000e+000 -1.000000e+000
      outer loop
         vertex 6.534519e+001 9.619697e+001 1.147382e+002
         vertex 6.752612e+001 9.722304e+001 1.147382e+002
         vertex 6.739077e+001 9.671792e+001 1.147382e+002
      endloop
   endfacet
   facet normal 0.000000e+000 0.000000e+000 -1.000000e+000
      outer loop
         vertex 6.534519e+001 9.619697e+001 1.147382e+002
         vertex 6.739077e+001 9.671792e+001 1.147382e+002
         vertex 6.734519e+001 9.619697e+001 1.147382e+002
      endloop
   endfacet
   facet normal 0.000000e+000 0.000000e+000 -1.000000e+000
      outer loop
         vertex 7.390771e+000 1.046760e+002 1.147382e+002
         vertex 7.526116e+000 1.041709e+002 1.147382e+002
         vertex 4.345194e+000 1.051970e+002 1.147382e+002
      endloop
   endfacet
   facet normal 0.000000e+000 0.000000e+000 -1.000000e+000
      outer loop
         vertex 4.345194e+000 1.051970e+002 1.147382e+002
         vertex 7.526116e+000 1.041709e+002 1.147382e+002
         vertex 7.747118e+000 1.036970e+002 1.147382e+002
      endloop
   endfacet
   facet normal 0.000000e+000 0.000000e+000 -1.000000e+000
      outer loop
         vertex 4.345194e+000 1.051970e+002 1.147382e+002
         vertex 7.747118e+000 1.036970e+002 1.147382e+002
         vertex 8.845194e+000 9.879505e+001 1.147382e+002
      endloop
   endfacet
   facet normal 0.000000e+000 0.000000e+000 -1.000000e+000
      outer loop
         vertex 8.845194e+000 9.879505e+001 1.147382e+002
         vertex 7.747118e+000 1.036970e+002 1.147382e+002
         vertex 8.047061e+000 1.032686e+002 1.147382e+002
      endloop
   endfacet
   facet normal 0.000000e+000 0.000000e+000 -1.000000e+000
      outer loop
         vertex 8.845194e+000 9.879505e+001 1.147382e+002
         vertex 8.047061e+000 1.032686e+002 1.147382e+002
         vertex 8.416832e+000 1.028988e+002 1.147382e+002
      endloop
   endfacet
   facet normal 0.000000e+000 0.000000e+000 -1.000000e+000
      outer loop
         vertex 1.294327e+001 9.769698e+001 1.147382e+002
         vertex 1.264333e+001 9.812534e+001 1.147382e+002
         vertex 1.934519e+001 1.011970e+002 1.147382e+002
      endloop
   endfacet
   facet normal 0.000000e+000 0.000000e+000 -1.000000e+000
      outer loop
         vertex 1.934519e+001 1.011970e+002 1.147382e+002
         vertex 1.264333e+001 9.812534e+001 1.147382e+002
         vertex 1.227356e+001 9.849510e+001 1.147382e+002
      endloop
   endfacet
   facet normal 0.000000e+000 0.000000e+000 -1.000000e+000
      outer loop
         vertex 1.934519e+001 1.011970e+002 1.147382e+002
         vertex 1.227356e+001 9.849510e+001 1.147382e+002
         vertex 1.294327e+001 1.036970e+002 1.147382e+002
      endloop
   endfacet
   facet normal 0.000000e+000 0.000000e+000 -1.000000e+000
      outer loop
         vertex 1.294327e+001 1.036970e+002 1.147382e+002
         vertex 1.227356e+001 9.849510e+001 1.147382e+002
         vertex 1.184519e+001 9.879505e+001 1.147382e+002
      endloop
   endfacet
   facet normal 0.000000e+000 0.000000e+000 -1.000000e+000
      outer loop
         vertex 1.294327e+001 1.036970e+002 1.147382e+002
         vertex 1.184519e+001 9.879505e+001 1.147382e+002
         vertex 1.264333e+001 1.032686e+002 1.147382e+002
      endloop
   endfacet
   facet normal 0.000000e+000 0.000000e+000 -1.000000e+000
      outer loop
         vertex 1.034519e+001 1.021970e+002 1.147382e+002
         vertex 1.086614e+001 1.022426e+002 1.147382e+002
         vertex 1.086614e+001 9.915140e+001 1.147382e+002
      endloop
   endfacet
   facet normal 0.000000e+000 0.000000e+000 -1.000000e+000
      outer loop
         vertex 1.086614e+001 9.915140e+001 1.147382e+002
         vertex 1.086614e+001 1.022426e+002 1.147382e+002
         vertex 1.137125e+001 1.023779e+002 1.147382e+002
      endloop
   endfacet
   facet normal 0.000000e+000 0.000000e+000 -1.000000e+000
      outer loop
         vertex 1.086614e+001 9.915140e+001 1.147382e+002
         vertex 1.137125e+001 1.023779e+002 1.147382e+002
         vertex 1.137125e+001 9.901604e+001 1.147382e+002
      endloop
   endfacet
   facet normal 0.000000e+000 0.000000e+000 -1.000000e+000
      outer loop
         vertex 1.137125e+001 9.901604e+001 1.147382e+002
         vertex 1.137125e+001 1.023779e+002 1.147382e+002
         vertex 1.184519e+001 1.025989e+002 1.147382e+002
      endloop
   endfacet
   facet normal 0.000000e+000 0.000000e+000 -1.000000e+000
      outer loop
         vertex 1.137125e+001 9.901604e+001 1.147382e+002
         vertex 1.184519e+001 1.025989e+002 1.147382e+002
         vertex 1.184519e+001 9.879505e+001 1.147382e+002
      endloop
   endfacet
   facet normal 0.000000e+000 0.000000e+000 -1.000000e+000
      outer loop
         vertex 1.184519e+001 9.879505e+001 1.147382e+002
         vertex 1.184519e+001 1.025989e+002 1.147382e+002
         vertex 1.227356e+001 1.028988e+002 1.147382e+002
      endloop
   endfacet
   facet normal 0.000000e+000 0.000000e+000 -1.000000e+000
      outer loop
         vertex 1.184519e+001 9.879505e+001 1.147382e+002
         vertex 1.227356e+001 1.028988e+002 1.147382e+002
         vertex 1.264333e+001 1.032686e+002 1.147382e+002
      endloop
   endfacet
   facet normal 0.000000e+000 0.000000e+000 -1.000000e+000
      outer loop
         vertex 7.184520e+001 1.025989e+002 1.147382e+002
         vertex 7.227355e+001 1.028988e+002 1.147382e+002
         vertex 7.264333e+001 9.812534e+001 1.147382e+002
      endloop
   endfacet
   facet normal 0.000000e+000 0.000000e+000 -1.000000e+000
      outer loop
         vertex 7.264333e+001 9.812534e+001 1.147382e+002
         vertex 7.227355e+001 1.028988e+002 1.147382e+002
         vertex 7.264333e+001 1.032686e+002 1.147382e+002
      endloop
   endfacet
   facet normal 0.000000e+000 0.000000e+000 -1.000000e+000
      outer loop
         vertex 7.264333e+001 9.812534e+001 1.147382e+002
         vertex 7.264333e+001 1.032686e+002 1.147382e+002
         vertex 7.634519e+001 1.051970e+002 1.147382e+002
      endloop
   endfacet
   facet normal 0.000000e+000 0.000000e+000 -1.000000e+000
      outer loop
         vertex 7.634519e+001 1.051970e+002 1.147382e+002
         vertex 7.264333e+001 1.032686e+002 1.147382e+002
         vertex 7.294327e+001 1.036970e+002 1.147382e+002
      endloop
   endfacet
   facet normal 0.000000e+000 0.000000e+000 -1.000000e+000
      outer loop
         vertex 7.634519e+001 1.051970e+002 1.147382e+002
         vertex 7.294327e+001 1.036970e+002 1.147382e+002
         vertex 7.316427e+001 1.041709e+002 1.147382e+002
      endloop
   endfacet
   facet normal 0.000000e+000 0.000000e+000 -1.000000e+000
      outer loop
         vertex 7.264333e+001 9.812534e+001 1.147382e+002
         vertex 7.227355e+001 9.849510e+001 1.147382e+002
         vertex 7.184520e+001 1.025989e+002 1.147382e+002
      endloop
   endfacet
   facet normal 0.000000e+000 0.000000e+000 -1.000000e+000
      outer loop
         vertex 7.184520e+001 1.025989e+002 1.147382e+002
         vertex 7.227355e+001 9.849510e+001 1.147382e+002
         vertex 7.184520e+001 9.879505e+001 1.147382e+002
      endloop
   endfacet
   facet normal 0.000000e+000 0.000000e+000 -1.000000e+000
      outer loop
         vertex 7.184520e+001 1.025989e+002 1.147382e+002
         vertex 7.184520e+001 9.879505e+001 1.147382e+002
         vertex 7.137125e+001 1.023779e+002 1.147382e+002
      endloop
   endfacet
   facet normal 0.000000e+000 0.000000e+000 -1.000000e+000
      outer loop
         vertex 7.137125e+001 1.023779e+002 1.147382e+002
         vertex 7.184520e+001 9.879505e+001 1.147382e+002
         vertex 7.086613e+001 1.022426e+002 1.147382e+002
      endloop
   endfacet
   facet normal 0.000000e+000 0.000000e+000 -1.000000e+000
      outer loop
         vertex 6.841682e+001 9.849510e+001 1.147382e+002
         vertex 6.134519e+001 1.011970e+002 1.147382e+002
         vertex 6.884519e+001 9.879505e+001 1.147382e+002
      endloop
   endfacet
   facet normal 0.000000e+000 0.000000e+000 -1.000000e+000
      outer loop
         vertex 6.884519e+001 9.879505e+001 1.147382e+002
         vertex 6.134519e+001 1.011970e+002 1.147382e+002
         vertex 6.752612e+001 1.041709e+002 1.147382e+002
      endloop
   endfacet
   facet normal 0.000000e+000 0.000000e+000 -1.000000e+000
      outer loop
         vertex 6.884519e+001 9.879505e+001 1.147382e+002
         vertex 6.752612e+001 1.041709e+002 1.147382e+002
         vertex 6.931913e+001 9.901604e+001 1.147382e+002
      endloop
   endfacet
   facet normal 0.000000e+000 0.000000e+000 -1.000000e+000
      outer loop
         vertex 6.752612e+001 1.041709e+002 1.147382e+002
         vertex 6.774712e+001 1.036970e+002 1.147382e+002
         vertex 6.931913e+001 9.901604e+001 1.147382e+002
      endloop
   endfacet
   facet normal 0.000000e+000 0.000000e+000 -1.000000e+000
      outer loop
         vertex 6.931913e+001 9.901604e+001 1.147382e+002
         vertex 6.774712e+001 1.036970e+002 1.147382e+002
         vertex 6.804706e+001 1.032686e+002 1.147382e+002
      endloop
   endfacet
   facet normal 0.000000e+000 0.000000e+000 -1.000000e+000
      outer loop
         vertex 6.931913e+001 9.901604e+001 1.147382e+002
         vertex 6.804706e+001 1.032686e+002 1.147382e+002
         vertex 6.841682e+001 1.028988e+002 1.147382e+002
      endloop
   endfacet
   facet normal 0.000000e+000 0.000000e+000 -1.000000e+000
      outer loop
         vertex 6.841682e+001 1.028988e+002 1.147382e+002
         vertex 6.884519e+001 1.025989e+002 1.147382e+002
         vertex 6.931913e+001 9.901604e+001 1.147382e+002
      endloop
   endfacet
   facet normal 0.000000e+000 0.000000e+000 -1.000000e+000
      outer loop
         vertex 6.931913e+001 9.901604e+001 1.147382e+002
         vertex 6.884519e+001 1.025989e+002 1.147382e+002
         vertex 6.931913e+001 1.023779e+002 1.147382e+002
      endloop
   endfacet
   facet normal 0.000000e+000 0.000000e+000 -1.000000e+000
      outer loop
         vertex 6.931913e+001 9.901604e+001 1.147382e+002
         vertex 6.931913e+001 1.023779e+002 1.147382e+002
         vertex 6.982425e+001 1.022426e+002 1.147382e+002
      endloop
   endfacet
   facet normal 0.000000e+000 0.000000e+000 -1.000000e+000
      outer loop
         vertex 7.184520e+001 9.879505e+001 1.147382e+002
         vertex 7.137125e+001 9.901604e+001 1.147382e+002
         vertex 7.086613e+001 1.022426e+002 1.147382e+002
      endloop
   endfacet
   facet normal 0.000000e+000 0.000000e+000 -1.000000e+000
      outer loop
         vertex 7.086613e+001 1.022426e+002 1.147382e+002
         vertex 7.137125e+001 9.901604e+001 1.147382e+002
         vertex 7.086613e+001 9.915140e+001 1.147382e+002
      endloop
   endfacet
   facet normal 0.000000e+000 0.000000e+000 -1.000000e+000
      outer loop
         vertex 7.086613e+001 1.022426e+002 1.147382e+002
         vertex 7.086613e+001 9.915140e+001 1.147382e+002
         vertex 7.034519e+001 1.021970e+002 1.147382e+002
      endloop
   endfacet
   facet normal 0.000000e+000 0.000000e+000 -1.000000e+000
      outer loop
         vertex 7.034519e+001 1.021970e+002 1.147382e+002
         vertex 7.086613e+001 9.915140e+001 1.147382e+002
         vertex 7.034519e+001 9.919697e+001 1.147382e+002
      endloop
   endfacet
   facet normal 0.000000e+000 0.000000e+000 -1.000000e+000
      outer loop
         vertex 7.034519e+001 1.021970e+002 1.147382e+002
         vertex 7.034519e+001 9.919697e+001 1.147382e+002
         vertex 6.982425e+001 1.022426e+002 1.147382e+002
      endloop
   endfacet
   facet normal 0.000000e+000 0.000000e+000 -1.000000e+000
      outer loop
         vertex 6.982425e+001 1.022426e+002 1.147382e+002
         vertex 7.034519e+001 9.919697e+001 1.147382e+002
         vertex 6.982425e+001 9.915140e+001 1.147382e+002
      endloop
   endfacet
   facet normal 0.000000e+000 0.000000e+000 -1.000000e+000
      outer loop
         vertex 6.982425e+001 1.022426e+002 1.147382e+002
         vertex 6.982425e+001 9.915140e+001 1.147382e+002
         vertex 6.931913e+001 9.901604e+001 1.147382e+002
      endloop
   endfacet
   facet normal 0.000000e+000 0.000000e+000 -1.000000e+000
      outer loop
         vertex 1.917064e+001 1.051970e+002 1.247382e+002
         vertex 1.534519e+001 1.051970e+002 1.247382e+002
         vertex 1.917064e+001 1.672833e+002 1.247382e+002
      endloop
   endfacet
   facet normal 0.000000e+000 0.000000e+000 -1.000000e+000
      outer loop
         vertex 1.917064e+001 1.672833e+002 1.247382e+002
         vertex 1.534519e+001 1.051970e+002 1.247382e+002
         vertex 1.534519e+001 1.707570e+002 1.247382e+002
      endloop
   endfacet
   facet normal 0.000000e+000 0.000000e+000 -1.000000e+000
      outer loop
         vertex 1.917064e+001 1.672833e+002 1.247382e+002
         vertex 1.534519e+001 1.707570e+002 1.247382e+002
         vertex 6.151974e+001 1.672833e+002 1.247382e+002
      endloop
   endfacet
   facet normal 0.000000e+000 0.000000e+000 -1.000000e+000
      outer loop
         vertex 6.151974e+001 1.672833e+002 1.247382e+002
         vertex 1.534519e+001 1.707570e+002 1.247382e+002
         vertex 6.534519e+001 1.707570e+002 1.247382e+002
      endloop
   endfacet
   facet normal 0.000000e+000 0.000000e+000 -1.000000e+000
      outer loop
         vertex 6.151974e+001 1.672833e+002 1.247382e+002
         vertex 6.534519e+001 1.707570e+002 1.247382e+002
         vertex 6.151974e+001 1.051970e+002 1.247382e+002
      endloop
   endfacet
   facet normal 0.000000e+000 0.000000e+000 -1.000000e+000
      outer loop
         vertex 6.151974e+001 1.051970e+002 1.247382e+002
         vertex 6.534519e+001 1.707570e+002 1.247382e+002
         vertex 6.534519e+001 1.051970e+002 1.247382e+002
      endloop
   endfacet
   facet normal 9.998477e-001 0.000000e+000 1.745241e-002
      outer loop
         vertex 1.934519e+001 3.463697e+001 1.147382e+002
         vertex 1.934519e+001 1.011970e+002 1.147382e+002
         vertex 1.864699e+001 3.393877e+001 1.547382e+002
      endloop
   endfacet
   facet normal 9.998477e-001 0.000000e+000 1.745241e-002
      outer loop
         vertex 1.864699e+001 3.393877e+001 1.547382e+002
         vertex 1.934519e+001 1.011970e+002 1.147382e+002
         vertex 1.917064e+001 1.013715e+002 1.247382e+002
      endloop
   endfacet
   facet normal 9.998477e-001 0.000000e+000 1.745241e-002
      outer loop
         vertex 1.864699e+001 3.393877e+001 1.547382e+002
         vertex 1.917064e+001 1.013715e+002 1.247382e+002
         vertex 1.864699e+001 1.678070e+002 1.547382e+002
      endloop
   endfacet
   facet normal 9.998477e-001 0.000000e+000 1.745241e-002
      outer loop
         vertex 1.864699e+001 1.678070e+002 1.547382e+002
         vertex 1.917064e+001 1.013715e+002 1.247382e+002
         vertex 1.917064e+001 1.051970e+002 1.247382e+002
      endloop
   endfacet
   facet normal 9.998477e-001 0.000000e+000 1.745241e-002
      outer loop
         vertex 1.864699e+001 1.678070e+002 1.547382e+002
         vertex 1.917064e+001 1.051970e+002 1.247382e+002
         vertex 1.917064e+001 1.672833e+002 1.247382e+002
      endloop
   endfacet
   facet normal 0.000000e+000 9.998477e-001 1.745241e-002
      outer loop
         vertex 2.284519e+001 3.452351e+001 1.212382e+002
         vertex 1.934519e+001 3.463697e+001 1.147382e+002
         vertex 2.284519e+001 3.405223e+001 1.482382e+002
      endloop
   endfacet
   facet normal 0.000000e+000 9.998477e-001 1.745241e-002
      outer loop
         vertex 2.284519e+001 3.405223e+001 1.482382e+002
         vertex 1.934519e+001 3.463697e+001 1.147382e+002
         vertex 1.864699e+001 3.393877e+001 1.547382e+002
      endloop
   endfacet
   facet normal 0.000000e+000 9.998477e-001 1.745241e-002
      outer loop
         vertex 2.284519e+001 3.405223e+001 1.482382e+002
         vertex 1.864699e+001 3.393877e+001 1.547382e+002
         vertex 5.784520e+001 3.405223e+001 1.482382e+002
      endloop
   endfacet
   facet normal 0.000000e+000 9.998477e-001 1.745241e-002
      outer loop
         vertex 5.784520e+001 3.405223e+001 1.482382e+002
         vertex 1.864699e+001 3.393877e+001 1.547382e+002
         vertex 6.204340e+001 3.393877e+001 1.547382e+002
      endloop
   endfacet
   facet normal 0.000000e+000 9.998477e-001 1.745241e-002
      outer loop
         vertex 5.784520e+001 3.405223e+001 1.482382e+002
         vertex 6.204340e+001 3.393877e+001 1.547382e+002
         vertex 5.784520e+001 3.452351e+001 1.212382e+002
      endloop
   endfacet
   facet normal 0.000000e+000 9.998477e-001 1.745241e-002
      outer loop
         vertex 5.784520e+001 3.452351e+001 1.212382e+002
         vertex 6.204340e+001 3.393877e+001 1.547382e+002
         vertex 6.134519e+001 3.463697e+001 1.147382e+002
      endloop
   endfacet
   facet normal 0.000000e+000 9.998477e-001 1.745241e-002
      outer loop
         vertex 5.784520e+001 3.452351e+001 1.212382e+002
         vertex 6.134519e+001 3.463697e+001 1.147382e+002
         vertex 2.284519e+001 3.452351e+001 1.212382e+002
      endloop
   endfacet
   facet normal 0.000000e+000 9.998477e-001 1.745241e-002
      outer loop
         vertex 2.284519e+001 3.452351e+001 1.212382e+002
         vertex 6.134519e+001 3.463697e+001 1.147382e+002
         vertex 1.934519e+001 3.463697e+001 1.147382e+002
      endloop
   endfacet
   facet normal -9.998477e-001 0.000000e+000 1.745241e-002
      outer loop
         vertex 6.134519e+001 1.011970e+002 1.147382e+002
         vertex 6.134519e+001 3.463697e+001 1.147382e+002
         vertex 6.151974e+001 1.013715e+002 1.247382e+002
      endloop
   endfacet
   facet normal -9.998477e-001 0.000000e+000 1.745241e-002
      outer loop
         vertex 6.151974e+001 1.013715e+002 1.247382e+002
         vertex 6.134519e+001 3.463697e+001 1.147382e+002
         vertex 6.204340e+001 3.393877e+001 1.547382e+002
      endloop
   endfacet
   facet normal -9.998477e-001 0.000000e+000 1.745241e-002
      outer loop
         vertex 6.151974e+001 1.013715e+002 1.247382e+002
         vertex 6.204340e+001 3.393877e+001 1.547382e+002
         vertex 6.151974e+001 1.051970e+002 1.247382e+002
      endloop
   endfacet
   facet normal -9.998477e-001 0.000000e+000 1.745241e-002
      outer loop
         vertex 6.151974e+001 1.051970e+002 1.247382e+002
         vertex 6.204340e+001 3.393877e+001 1.547382e+002
         vertex 6.204340e+001 1.678070e+002 1.547382e+002
      endloop
   endfacet
   facet normal -9.998477e-001 0.000000e+000 1.745241e-002
      outer loop
         vertex 6.151974e+001 1.051970e+002 1.247382e+002
         vertex 6.204340e+001 1.678070e+002 1.547382e+002
         vertex 6.151974e+001 1.672833e+002 1.247382e+002
      endloop
   endfacet
   facet normal 0.000000e+000 -9.998477e-001 1.745241e-002
      outer loop
         vertex 1.917064e+001 1.013715e+002 1.247382e+002
         vertex 1.934519e+001 1.011970e+002 1.147382e+002
         vertex 6.151974e+001 1.013715e+002 1.247382e+002
      endloop
   endfacet
   facet normal 0.000000e+000 -9.998477e-001 1.745241e-002
      outer loop
         vertex 6.151974e+001 1.013715e+002 1.247382e+002
         vertex 1.934519e+001 1.011970e+002 1.147382e+002
         vertex 6.134519e+001 1.011970e+002 1.147382e+002
      endloop
   endfacet
   facet normal 0.000000e+000 0.000000e+000 1.000000e+000
      outer loop
         vertex 6.151974e+001 1.013715e+002 1.247382e+002
         vertex 6.151974e+001 1.051970e+002 1.247382e+002
         vertex 1.917064e+001 1.013715e+002 1.247382e+002
      endloop
   endfacet
   facet normal 0.000000e+000 0.000000e+000 1.000000e+000
      outer loop
         vertex 1.917064e+001 1.013715e+002 1.247382e+002
         vertex 6.151974e+001 1.051970e+002 1.247382e+002
         vertex 1.917064e+001 1.051970e+002 1.247382e+002
      endloop
   endfacet
   facet normal 3.197425e-016 -9.998477e-001 1.745241e-002
      outer loop
         vertex 1.864699e+001 1.678070e+002 1.547382e+002
         vertex 1.917064e+001 1.672833e+002 1.247382e+002
         vertex 6.204340e+001 1.678070e+002 1.547382e+002
      endloop
   endfacet
   facet normal 3.197425e-016 -9.998477e-001 1.745241e-002
      outer loop
         vertex 6.204340e+001 1.678070e+002 1.547382e+002
         vertex 1.917064e+001 1.672833e+002 1.247382e+002
         vertex 6.151974e+001 1.672833e+002 1.247382e+002
      endloop
   endfacet
   facet normal -1.000000e+000 0.000000e+000 0.000000e+000
      outer loop
         vertex 5.784520e+001 3.063698e+001 1.482382e+002
         vertex 5.784520e+001 3.405223e+001 1.482382e+002
         vertex 5.784520e+001 3.063698e+001 1.212382e+002
      endloop
   endfacet
   facet normal -1.000000e+000 0.000000e+000 0.000000e+000
      outer loop
         vertex 5.784520e+001 3.063698e+001 1.212382e+002
         vertex 5.784520e+001 3.405223e+001 1.482382e+002
         vertex 5.784520e+001 3.452351e+001 1.212382e+002
      endloop
   endfacet
   facet normal -7.434529e-017 0.000000e+000 1.000000e+000
      outer loop
         vertex 2.284519e+001 3.063698e+001 1.212382e+002
         vertex 5.784520e+001 3.063698e+001 1.212382e+002
         vertex 2.284519e+001 3.452351e+001 1.212382e+002
      endloop
   endfacet
   facet normal -7.434529e-017 0.000000e+000 1.000000e+000
      outer loop
         vertex 2.284519e+001 3.452351e+001 1.212382e+002
         vertex 5.784520e+001 3.063698e+001 1.212382e+002
         vertex 5.784520e+001 3.452351e+001 1.212382e+002
      endloop
   endfacet
   facet normal 1.000000e+000 0.000000e+000 0.000000e+000
      outer loop
         vertex 2.284519e+001 3.063698e+001 1.482382e+002
         vertex 2.284519e+001 3.063698e+001 1.212382e+002
         vertex 2.284519e+001 3.405223e+001 1.482382e+002
      endloop
   endfacet
   facet normal 1.000000e+000 0.000000e+000 0.000000e+000
      outer loop
         vertex 2.284519e+001 3.405223e+001 1.482382e+002
         vertex 2.284519e+001 3.063698e+001 1.212382e+002
         vertex 2.284519e+001 3.452351e+001 1.212382e+002
      endloop
   endfacet
   facet normal 1.982541e-016 0.000000e+000 -1.000000e+000
      outer loop
         vertex 2.284519e+001 3.063698e+001 1.482382e+002
         vertex 2.284519e+001 3.405223e+001 1.482382e+002
         vertex 5.784520e+001 3.063698e+001 1.482382e+002
      endloop
   endfacet
   facet normal 1.982541e-016 0.000000e+000 -1.000000e+000
      outer loop
         vertex 5.784520e+001 3.063698e+001 1.482382e+002
         vertex 2.284519e+001 3.405223e+001 1.482382e+002
         vertex 5.784520e+001 3.405223e+001 1.482382e+002
      endloop
   endfacet
endsolid
